# Supplementary material for: Multi-modal magnetic resonance imaging in a mouse model of concussion
Source: PubMed Central journal article supplement (PMC8342546; doi:10.1038/s41597-021-00985-w), 2021-08-05

Supplementary File 2: "Signal" resting-state Group Independent Vector Analysis components. Figure previously included in.<sup>1</sup>

1. To, X. V. & Nasrallah, F. A. A roadmap of brain recovery in a mouse model of concussion: insights from neuroimaging. *Acta Neuropathol. Commun.* **9**, 2 (2021).

Anterior Cingulate Area + Prelimbic area

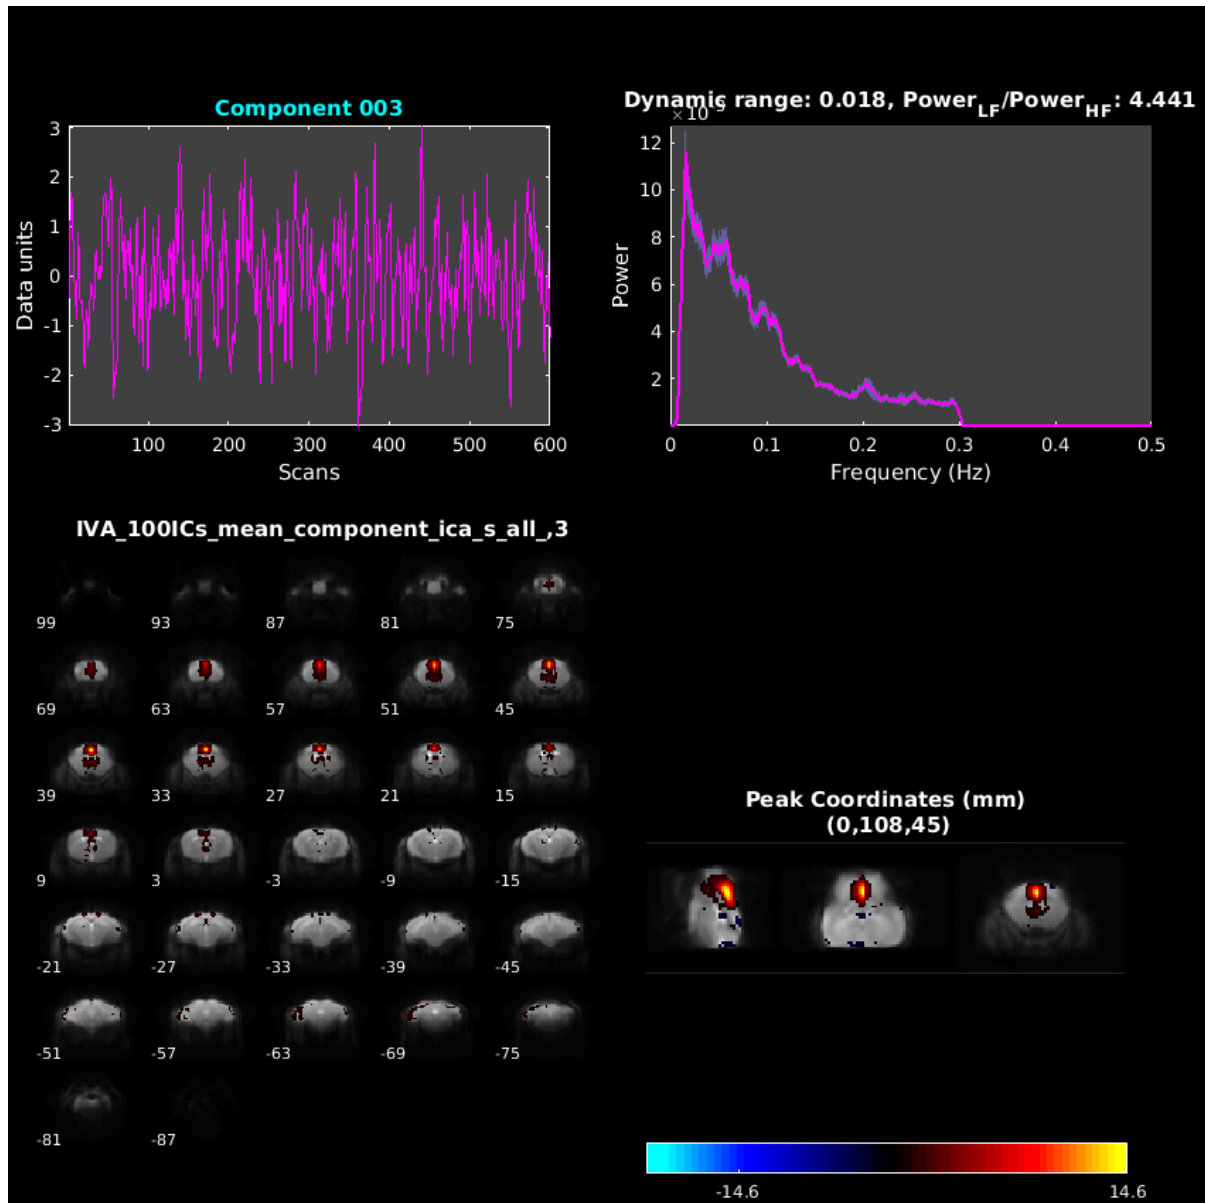

Retrosplenial area + Anterior Cingulate Area

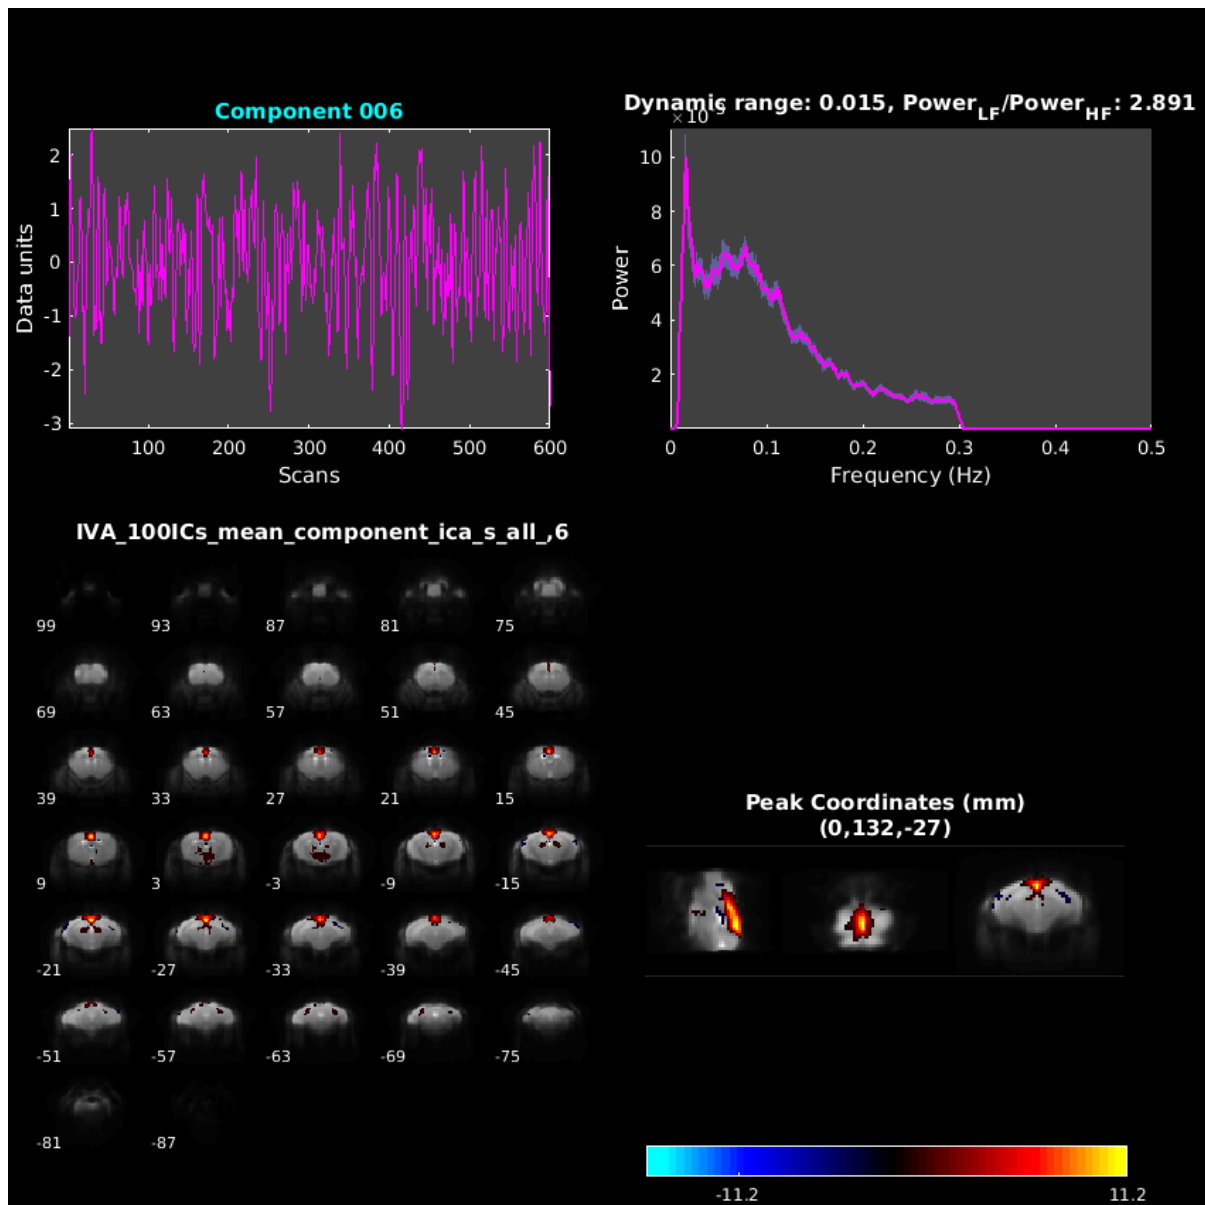

Retrosplenial area

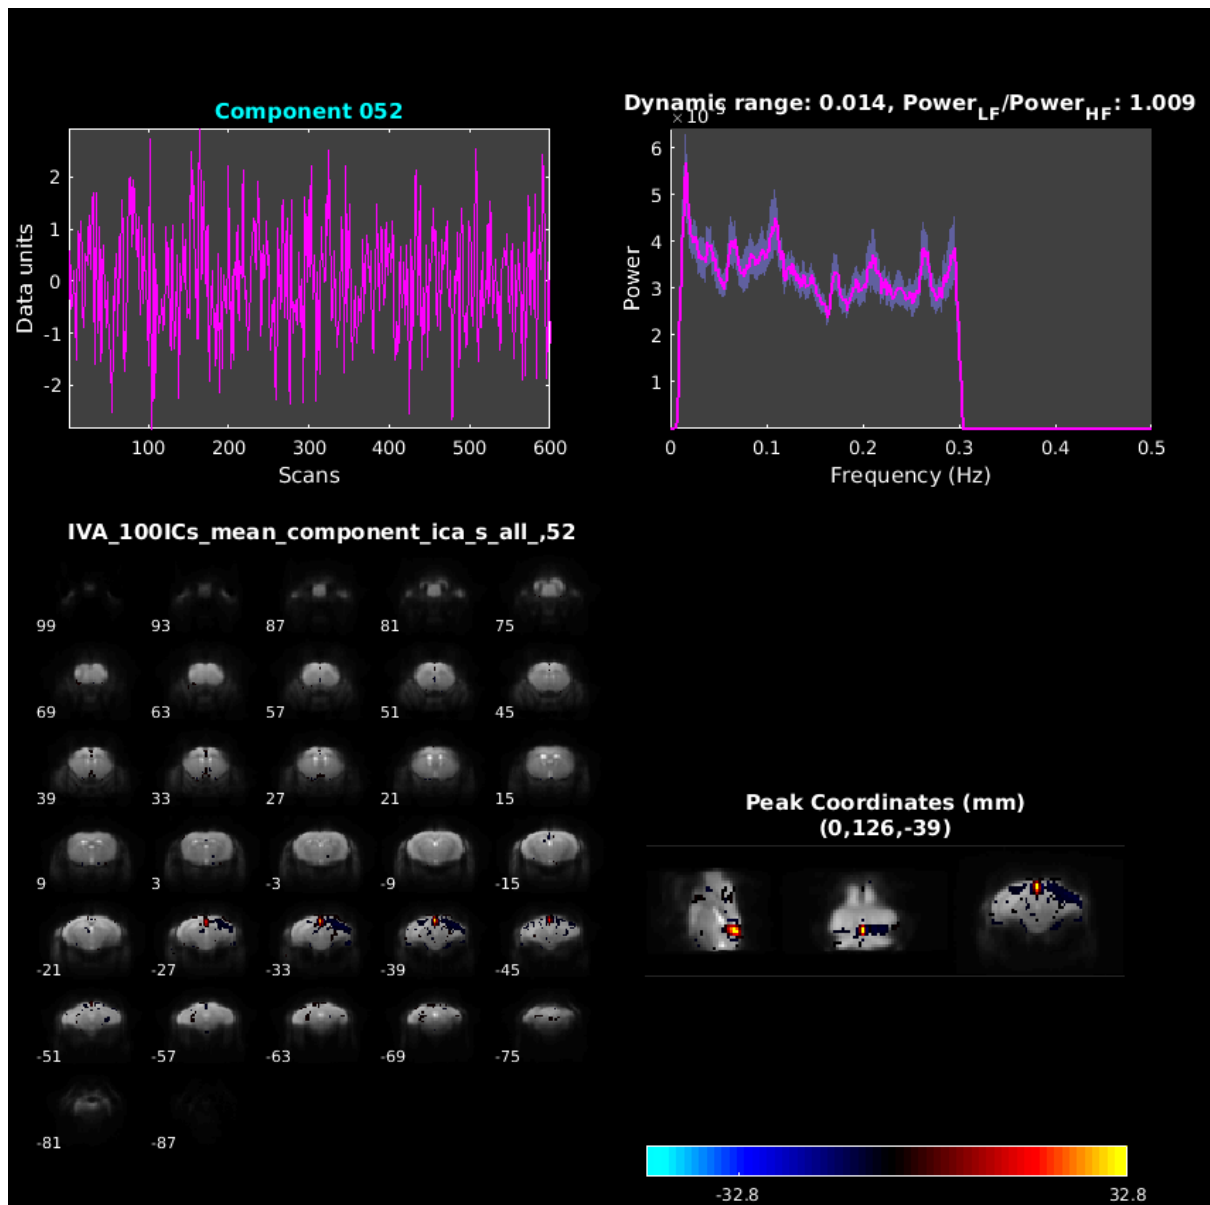

# Anterior Cingulate Area

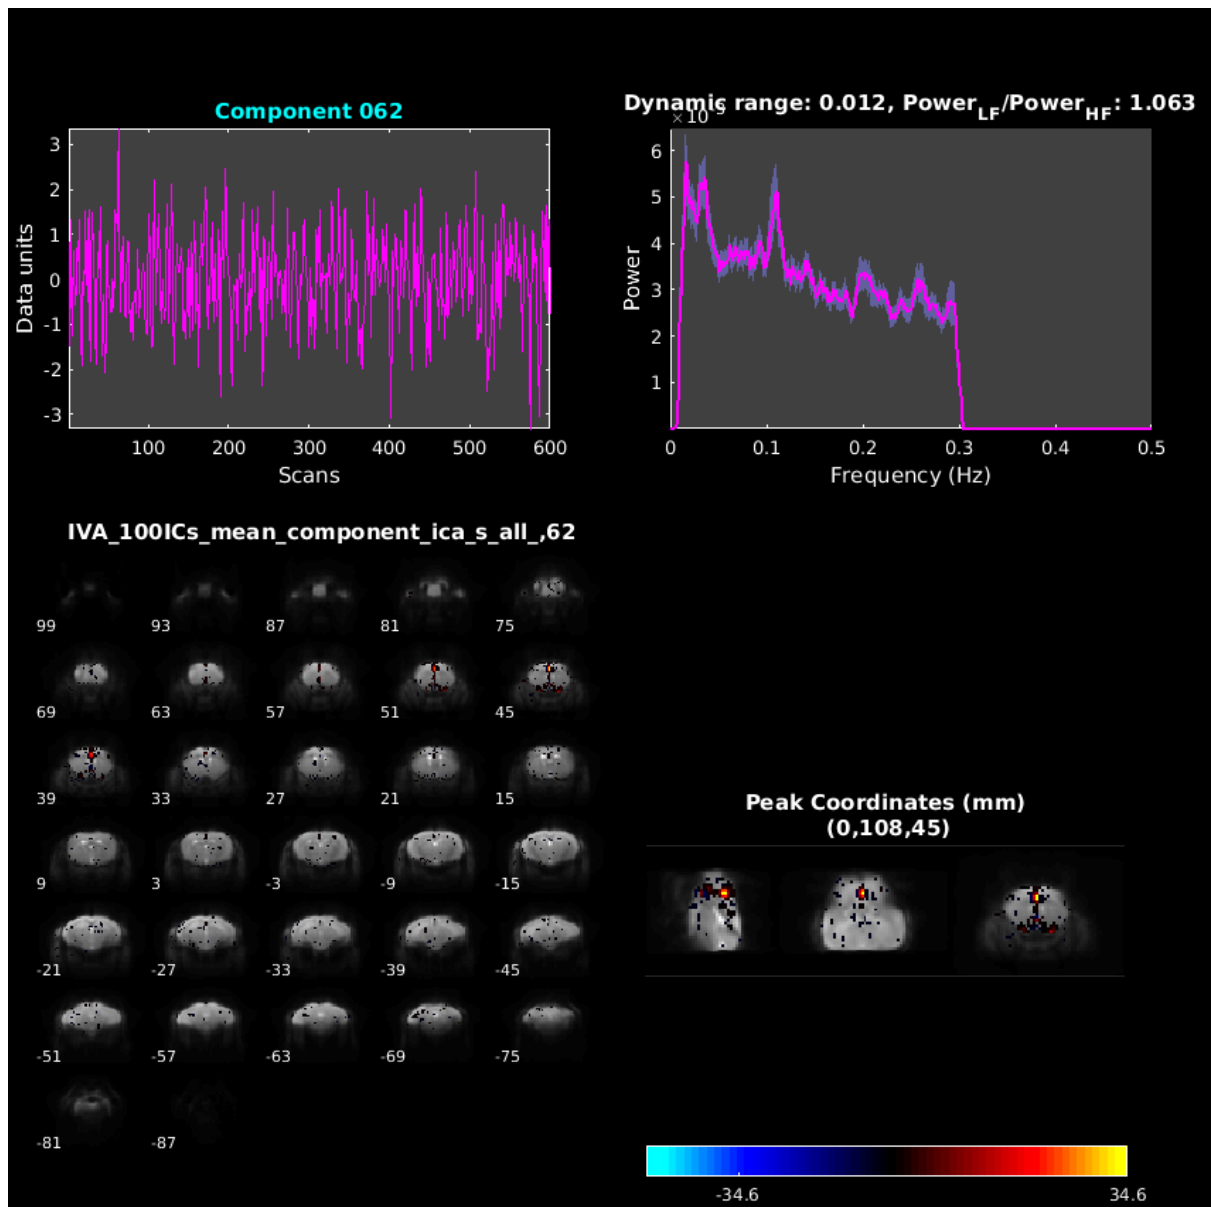

# Retrosplenial area

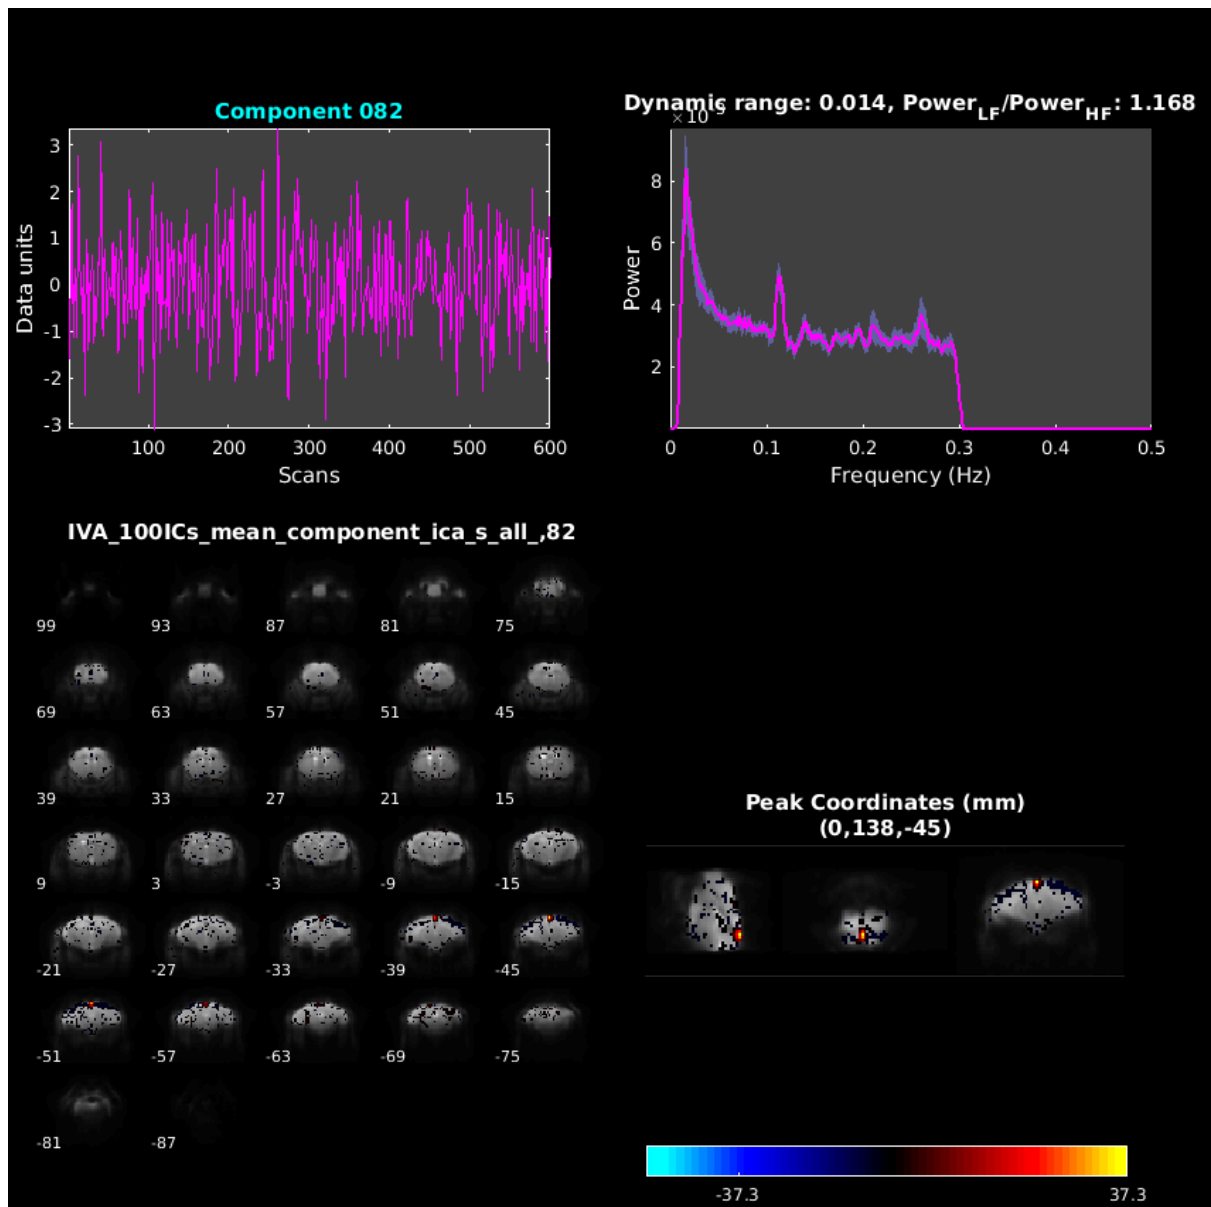

Infralimbic area

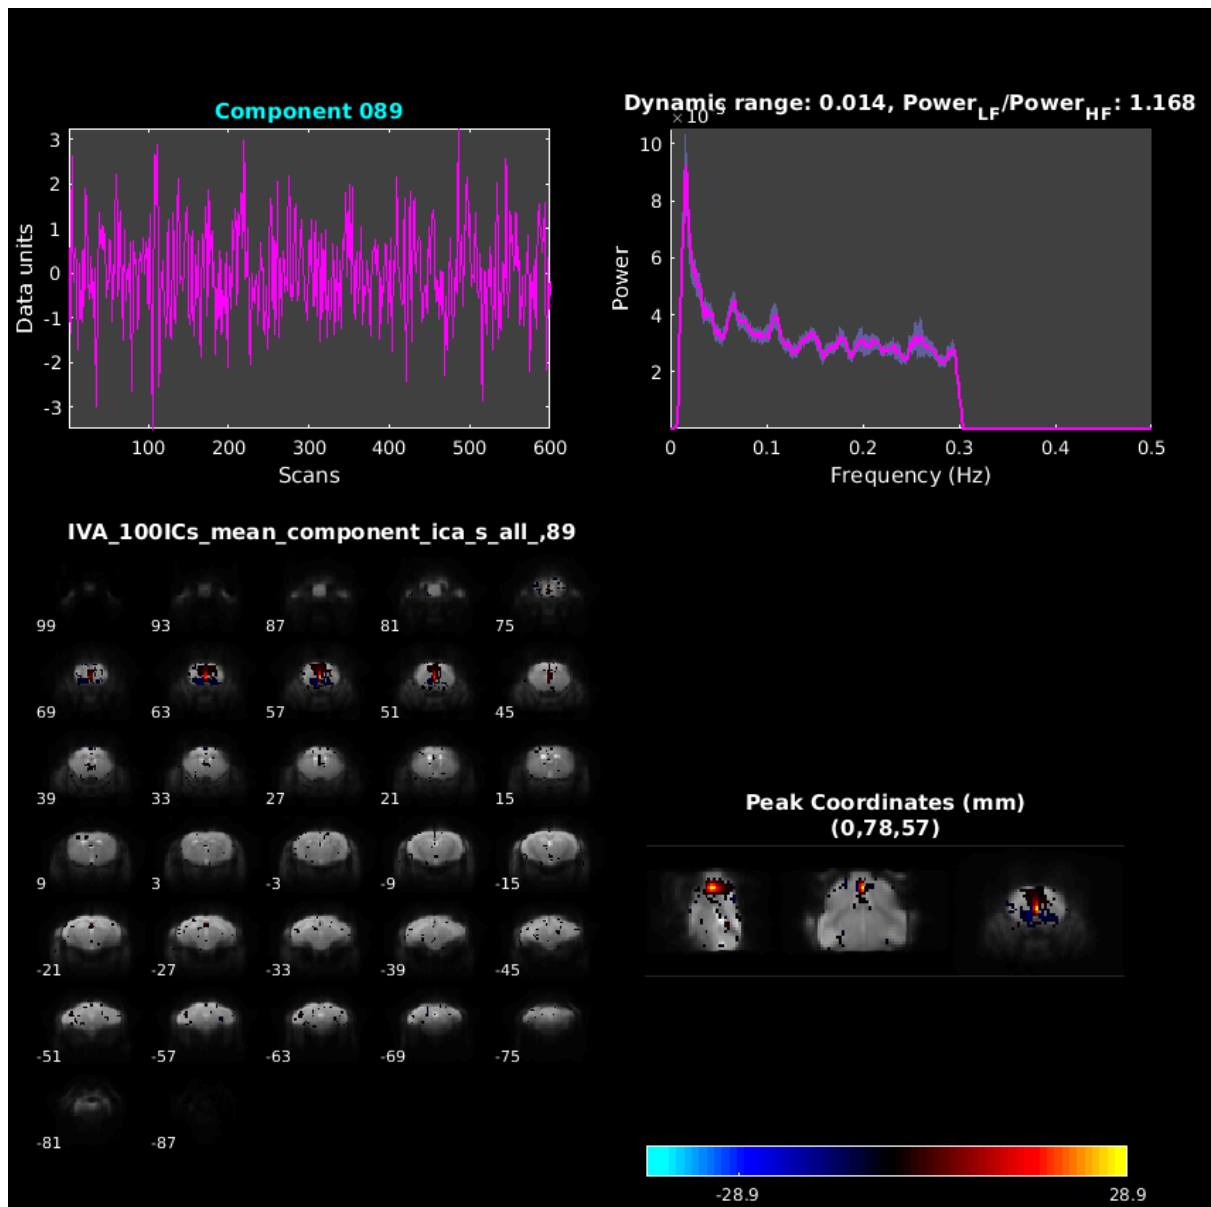

Subcortical spatial memory pathway (Retrohippocampal Area - Retrosplenial Area - Anterior Thalamic Nuclei - Anterior Cingulate Area)

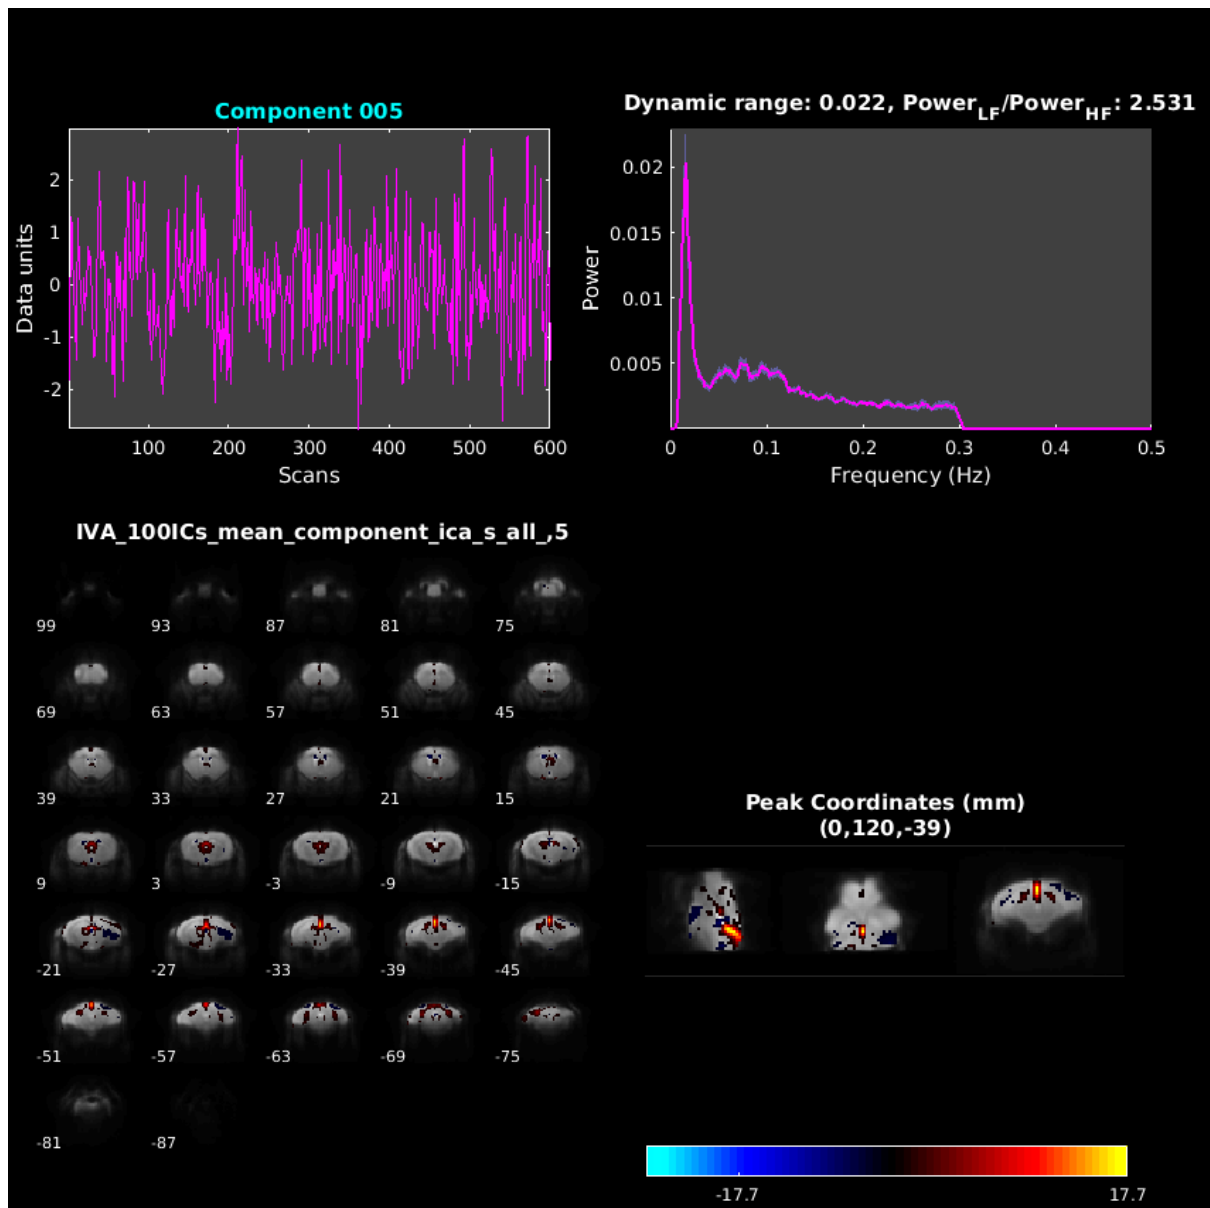

# Dentate Gyrus

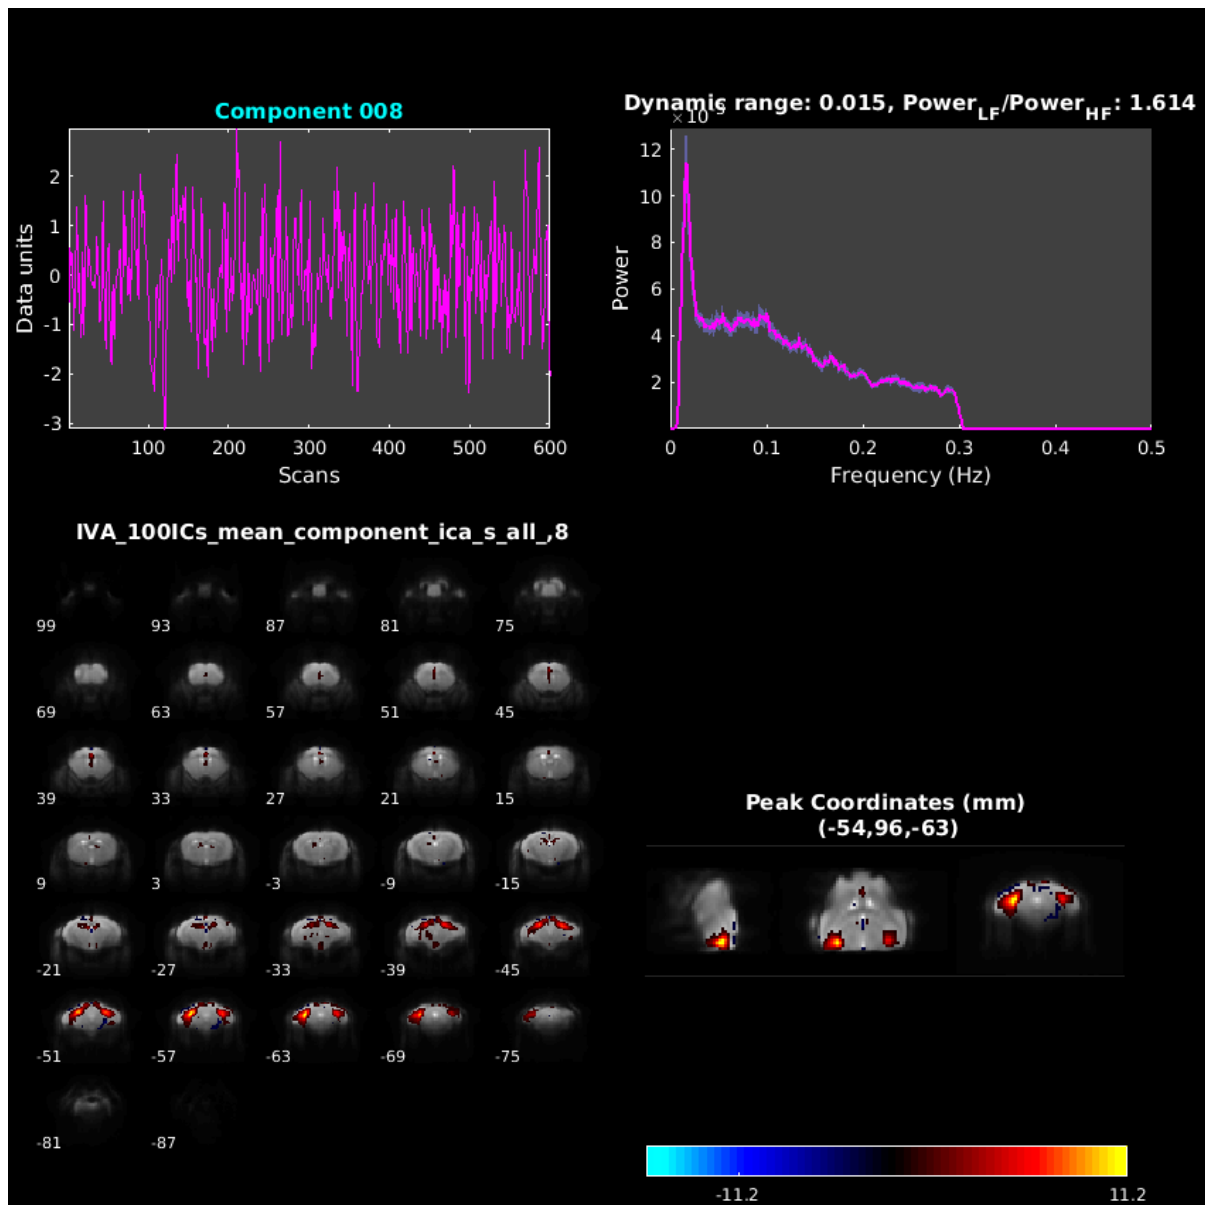



Anterior Thalamic Nucleus

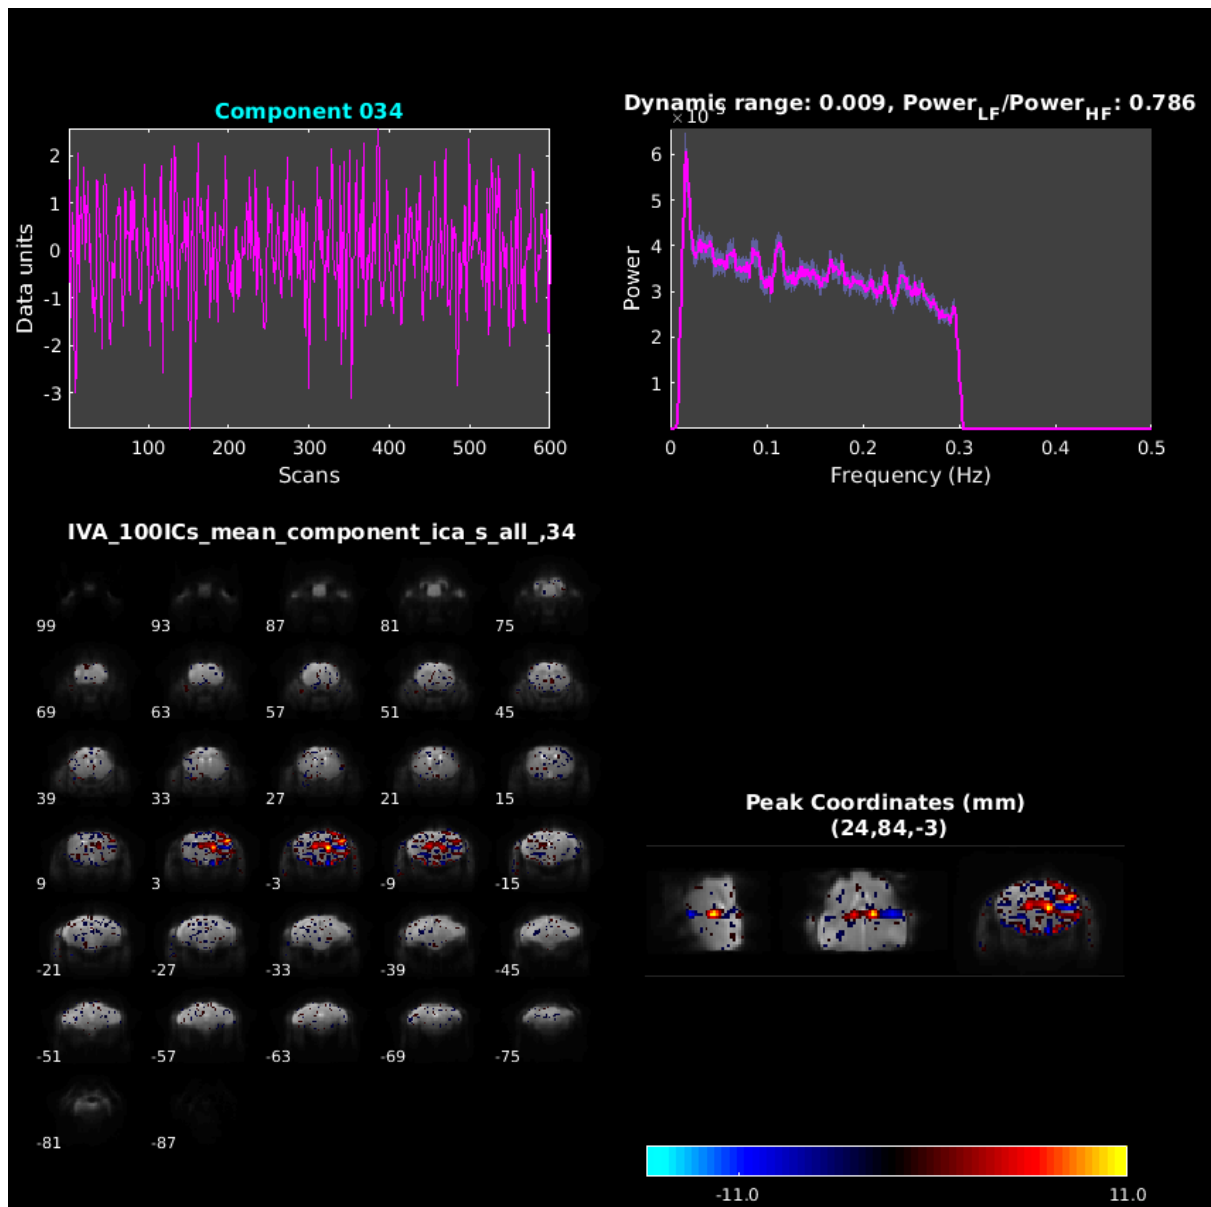

# Auditory Area

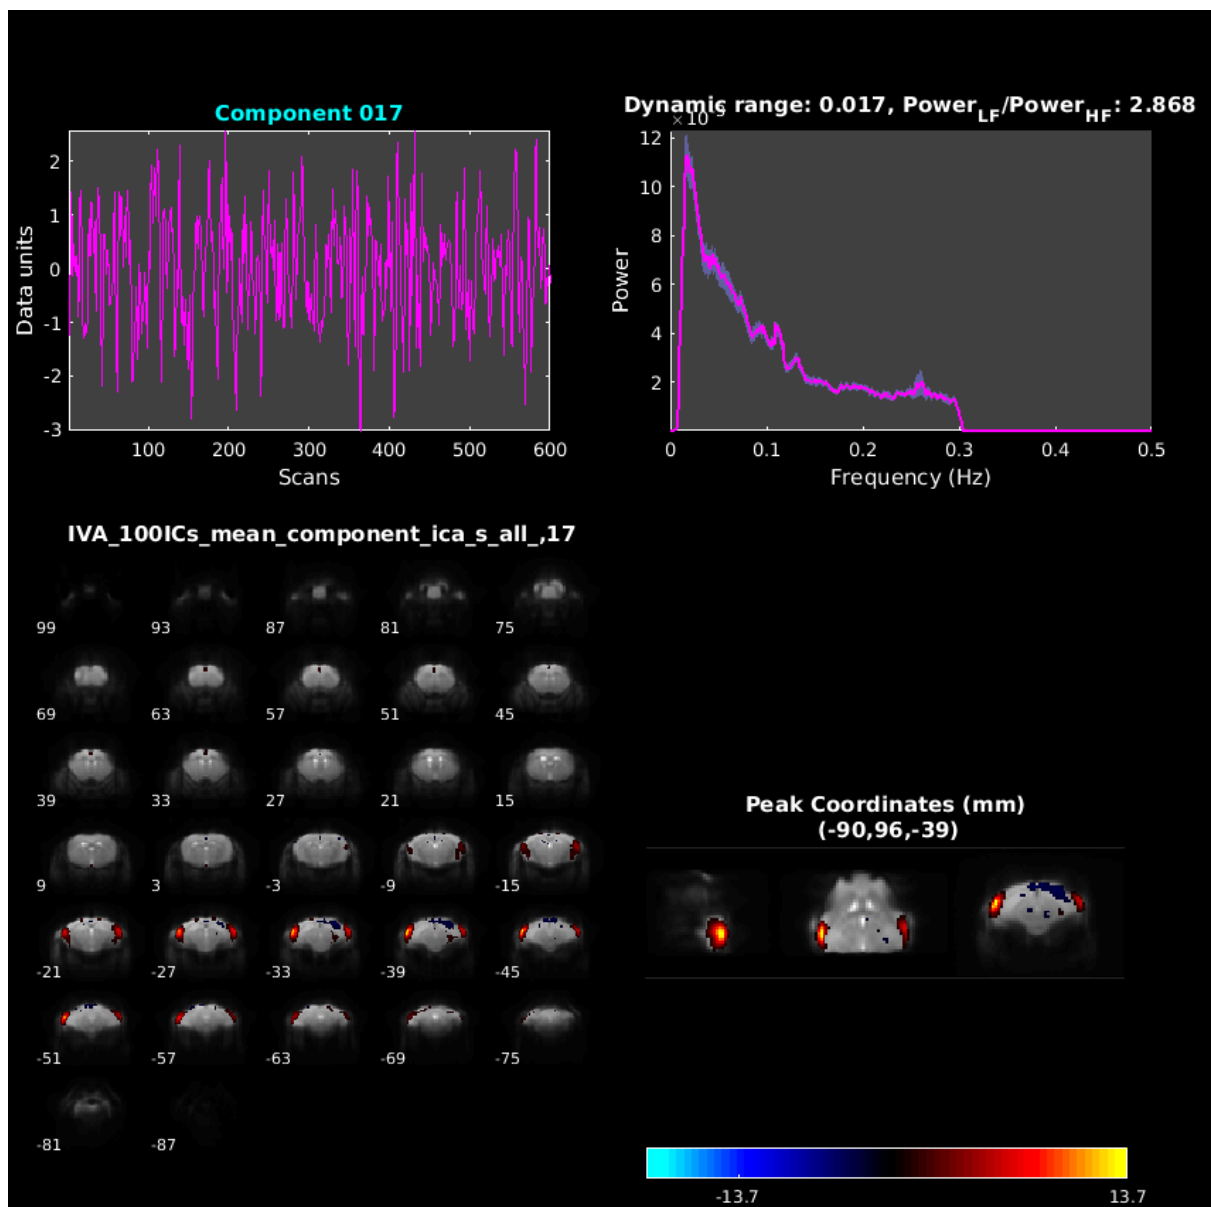

Visual Area

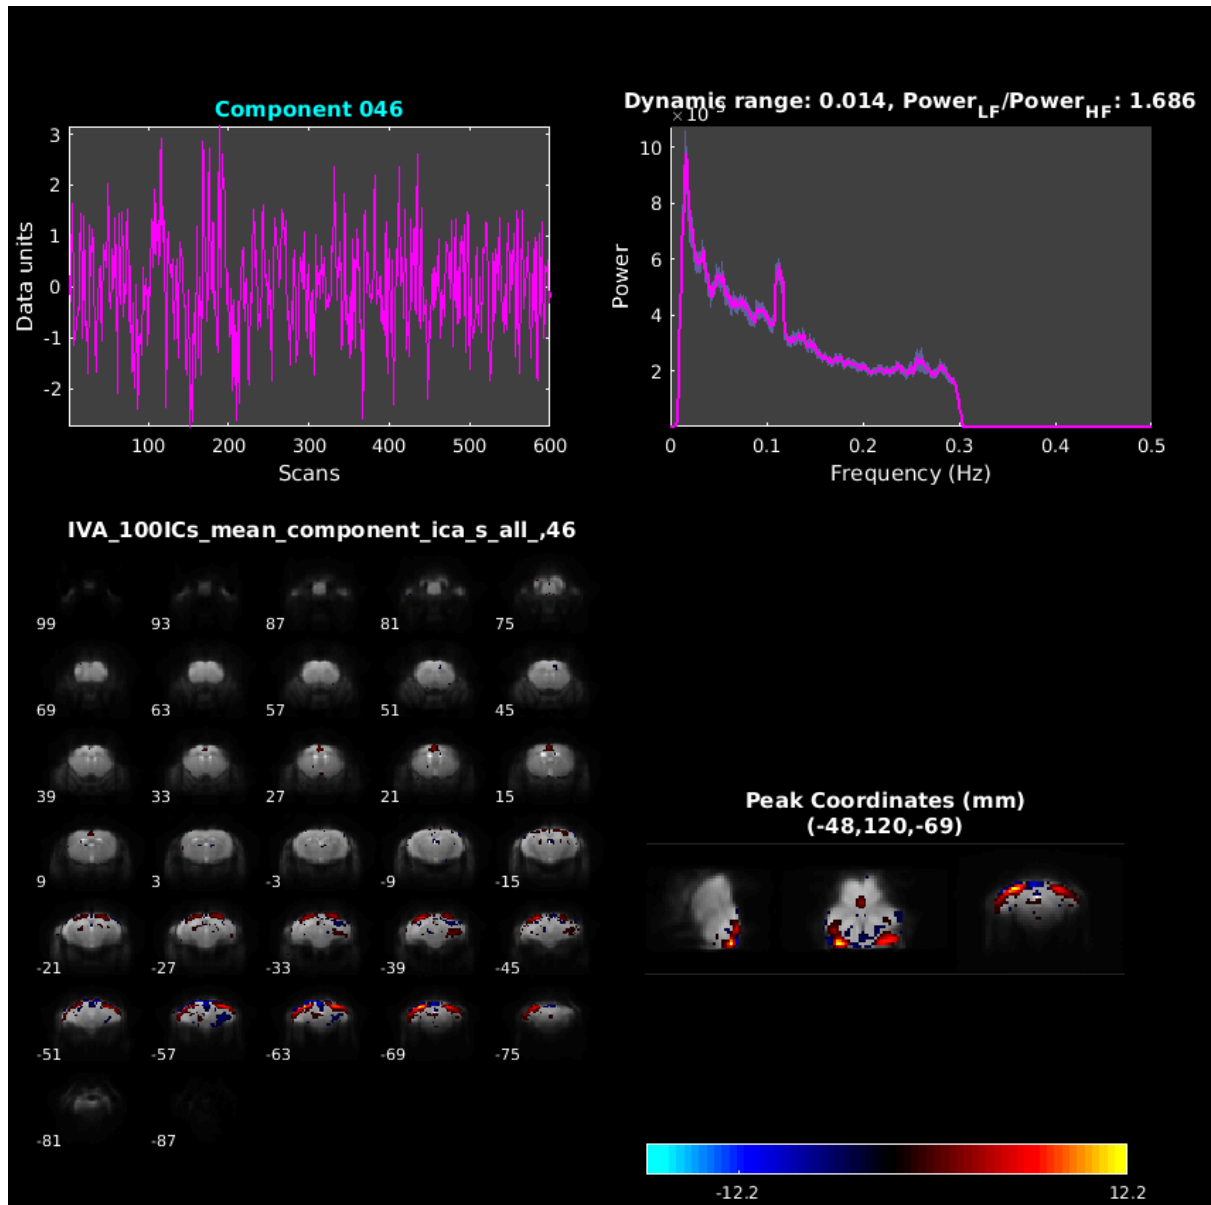

Primary Somatosensory Cortex (S1) (Lower Limbs, Trunks) + Posterior Parietal Association Area + Temporal Association Area

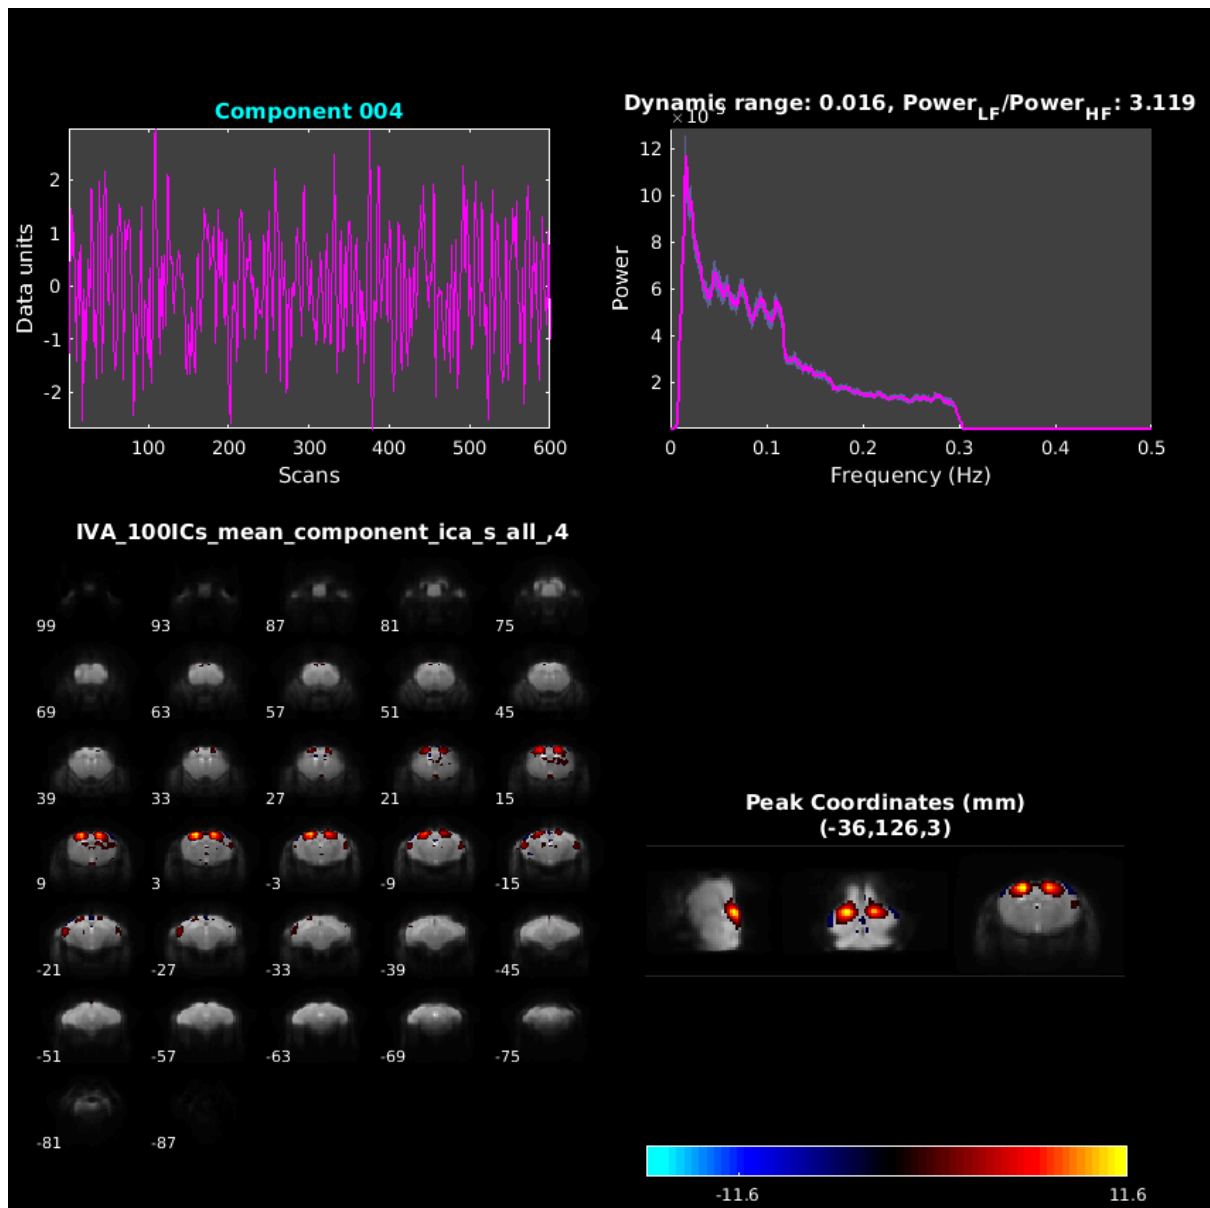

# Primary Somatosensory Cortex (Upper Limbs)

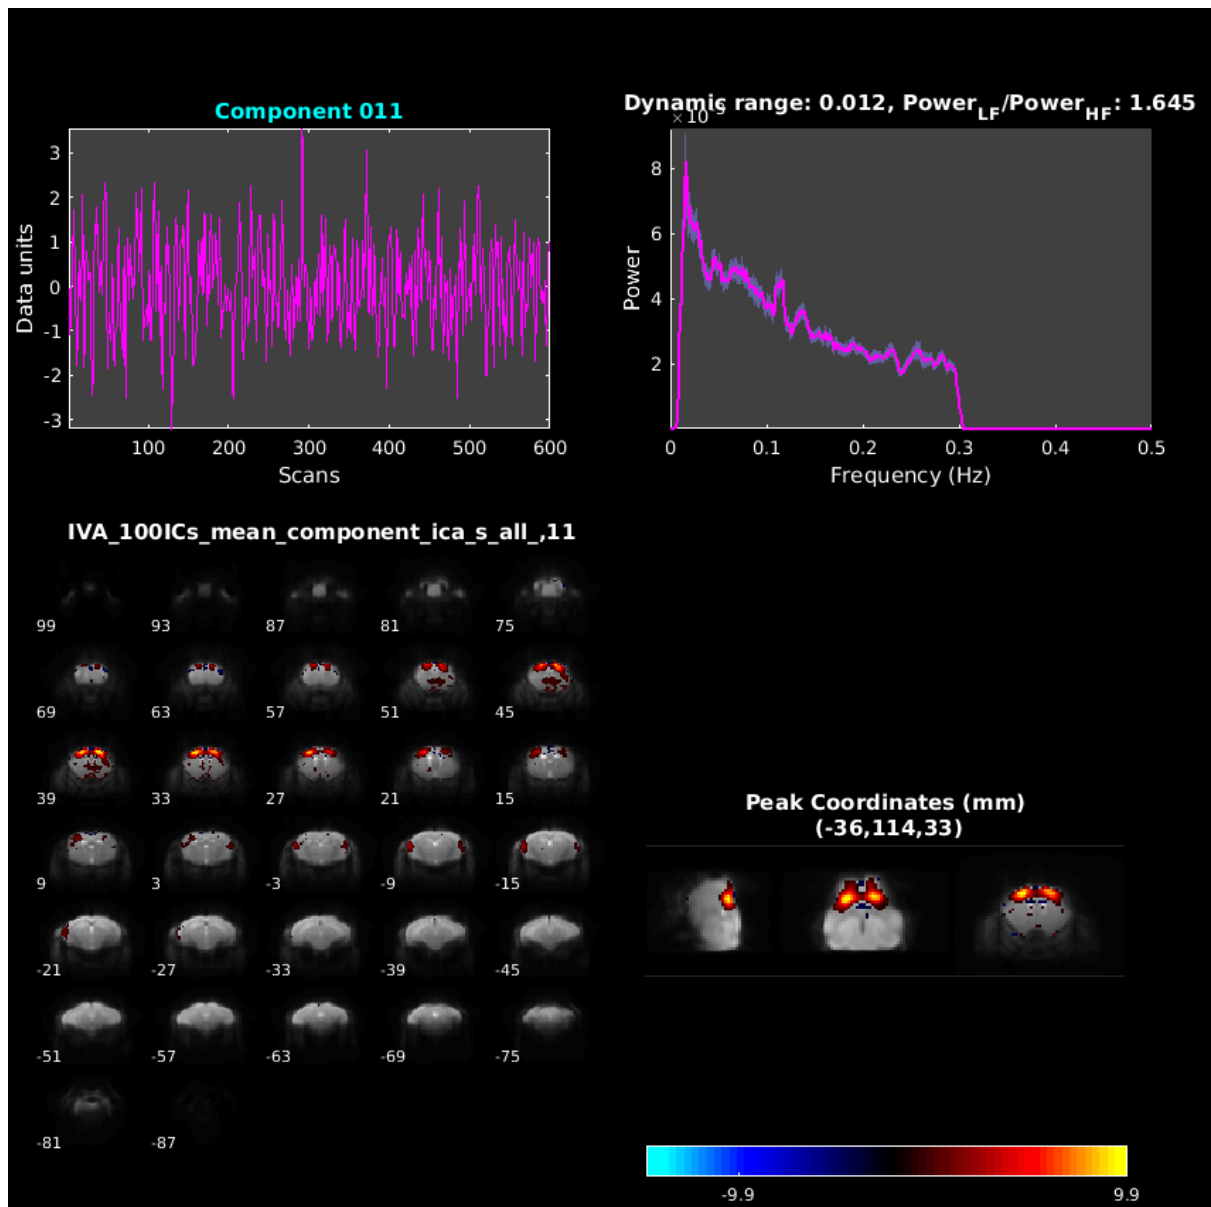

Primary Somatosensory Cortex (unassigned) + Visual Area

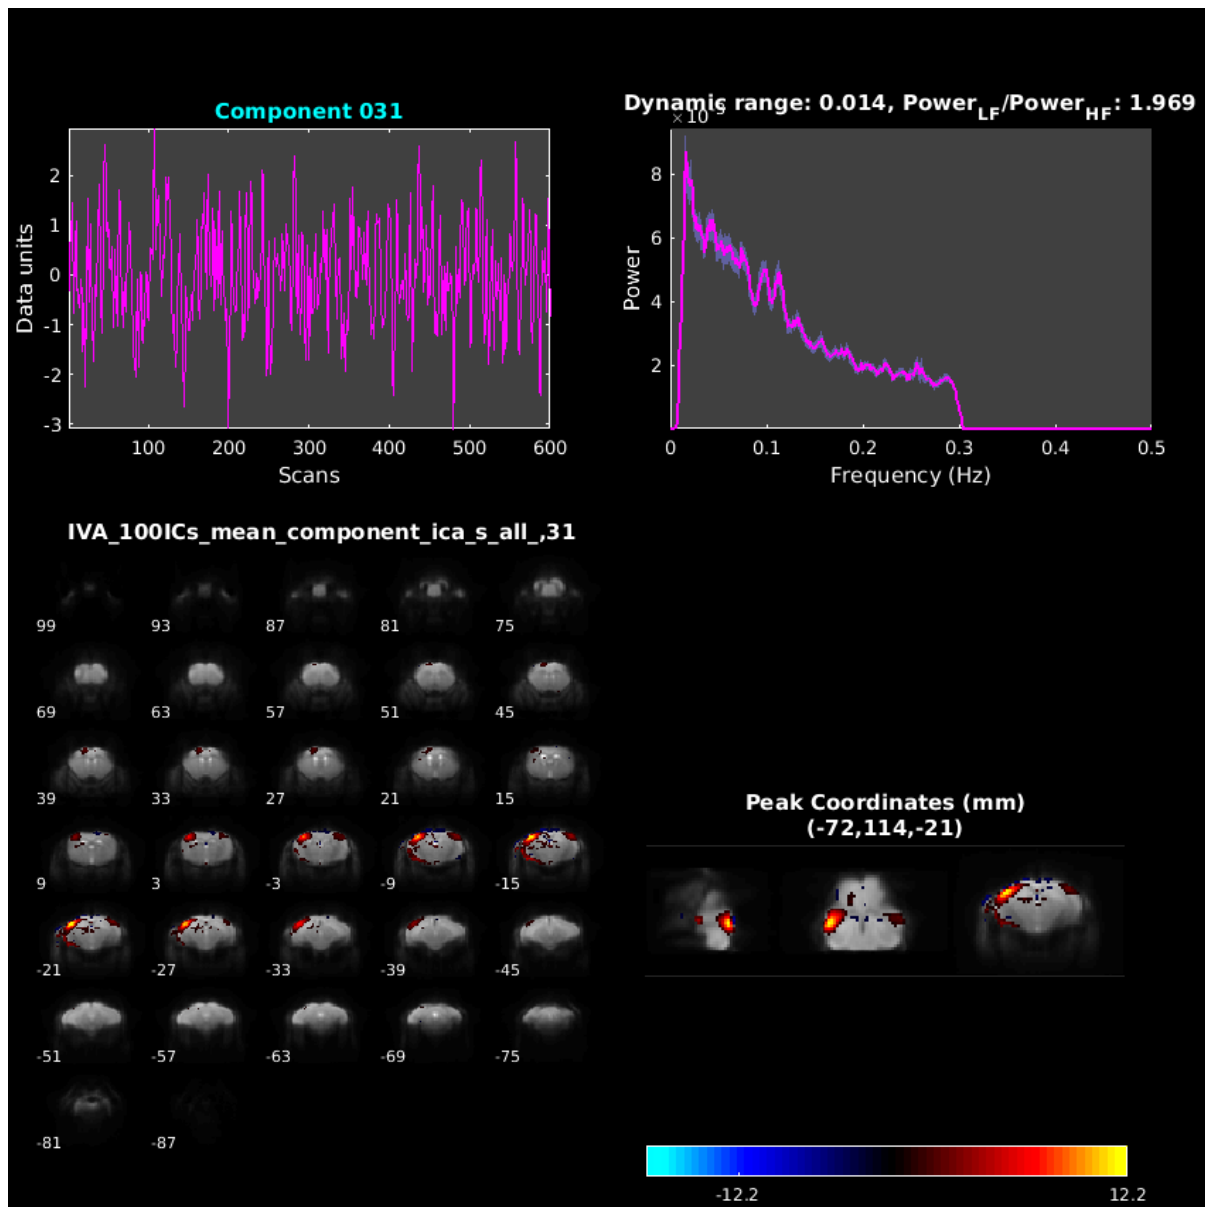

Thalamic nucleus (polymodal association cortex) + Primary Somatosensory Cortex

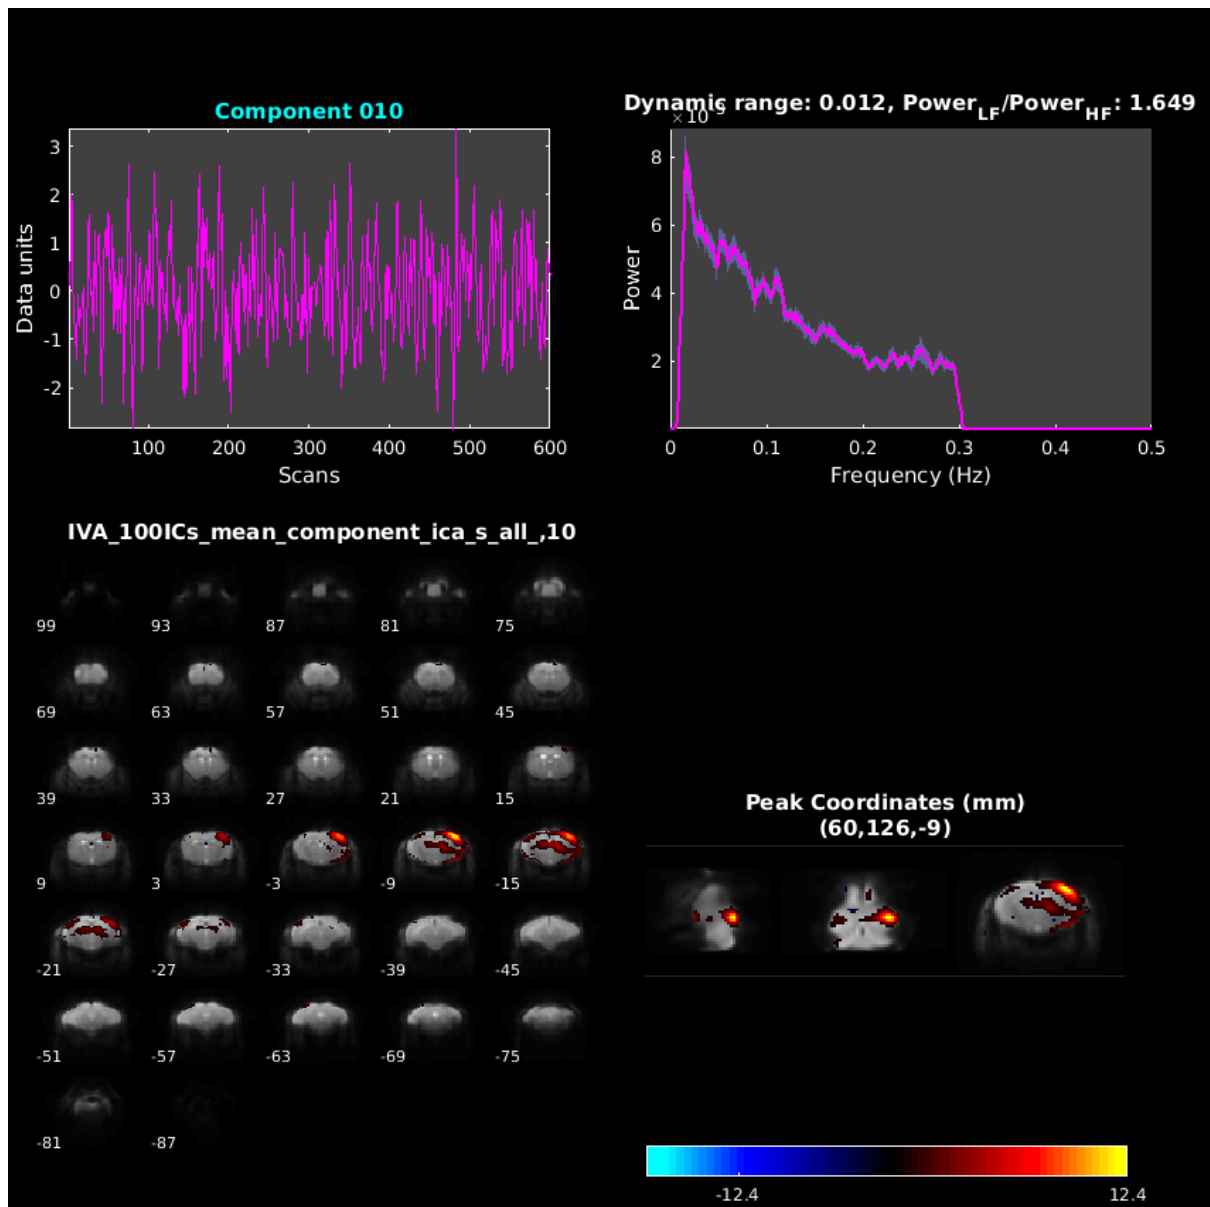

Thalamic nucleus (polymodal association cortex) + Pretectal Region + Visual-Auditory Area

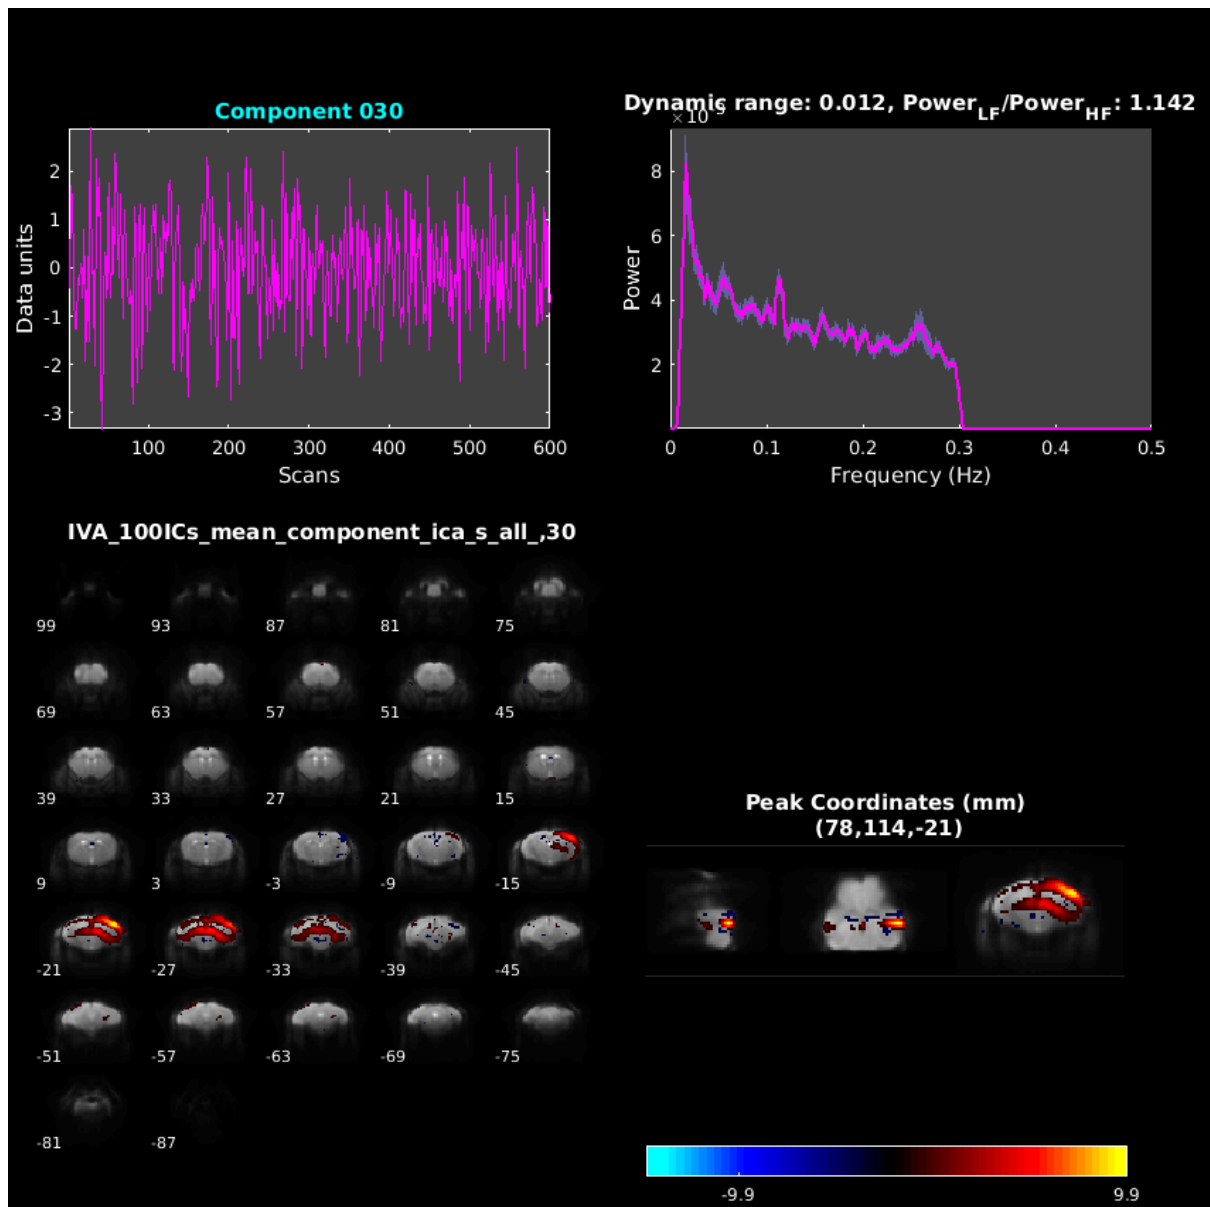



# Caudate Putamen

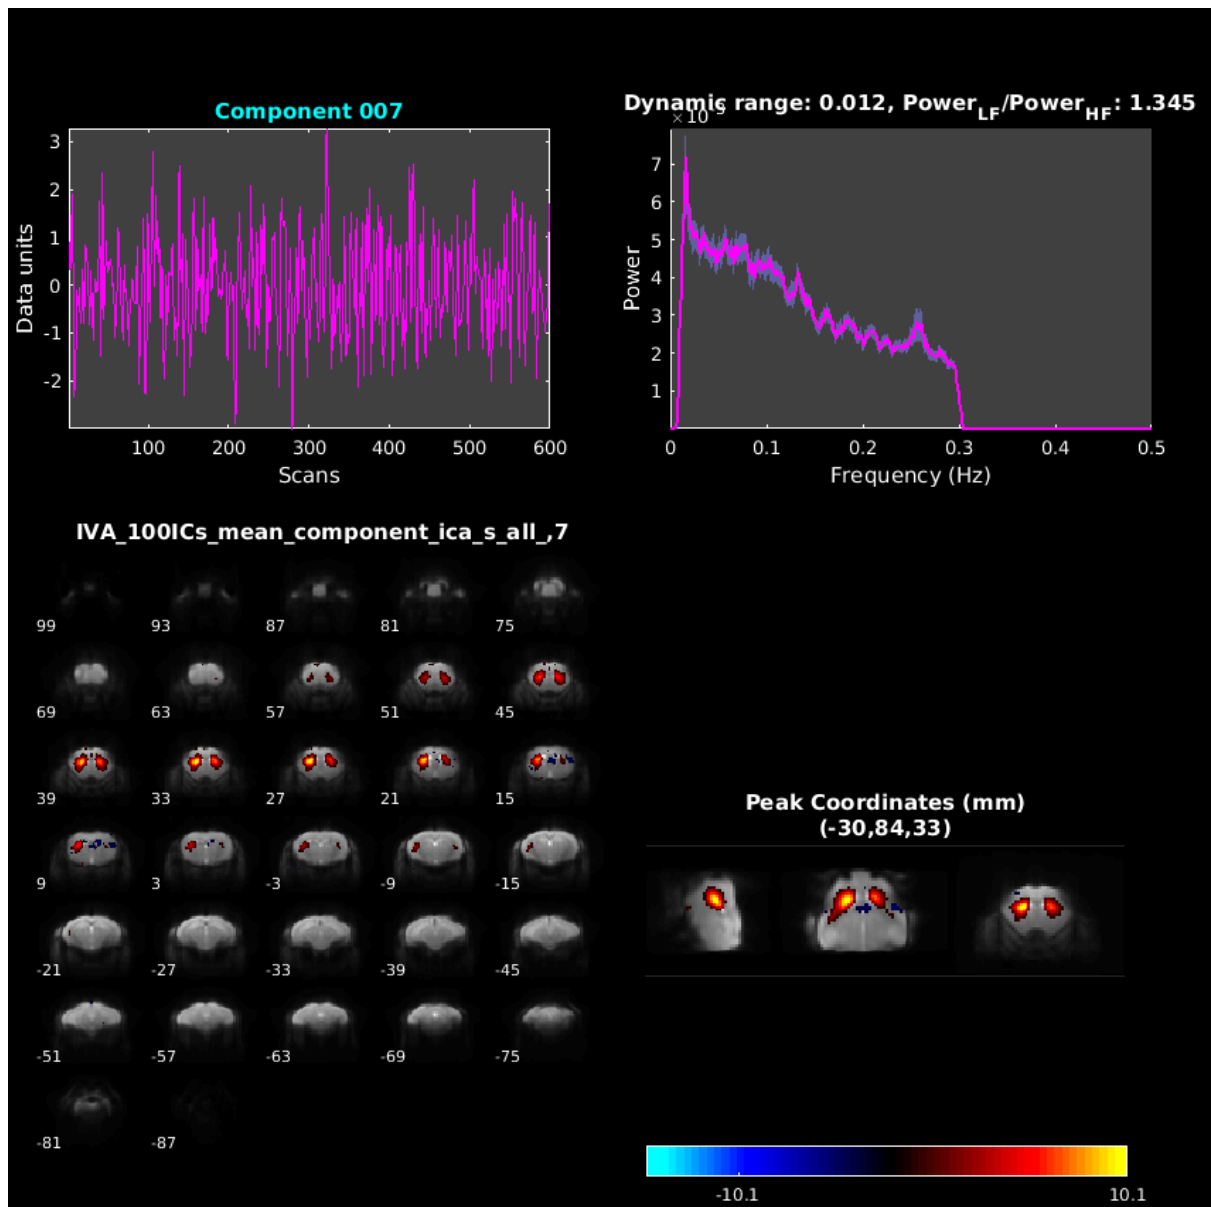

# Primary Motor Cortex

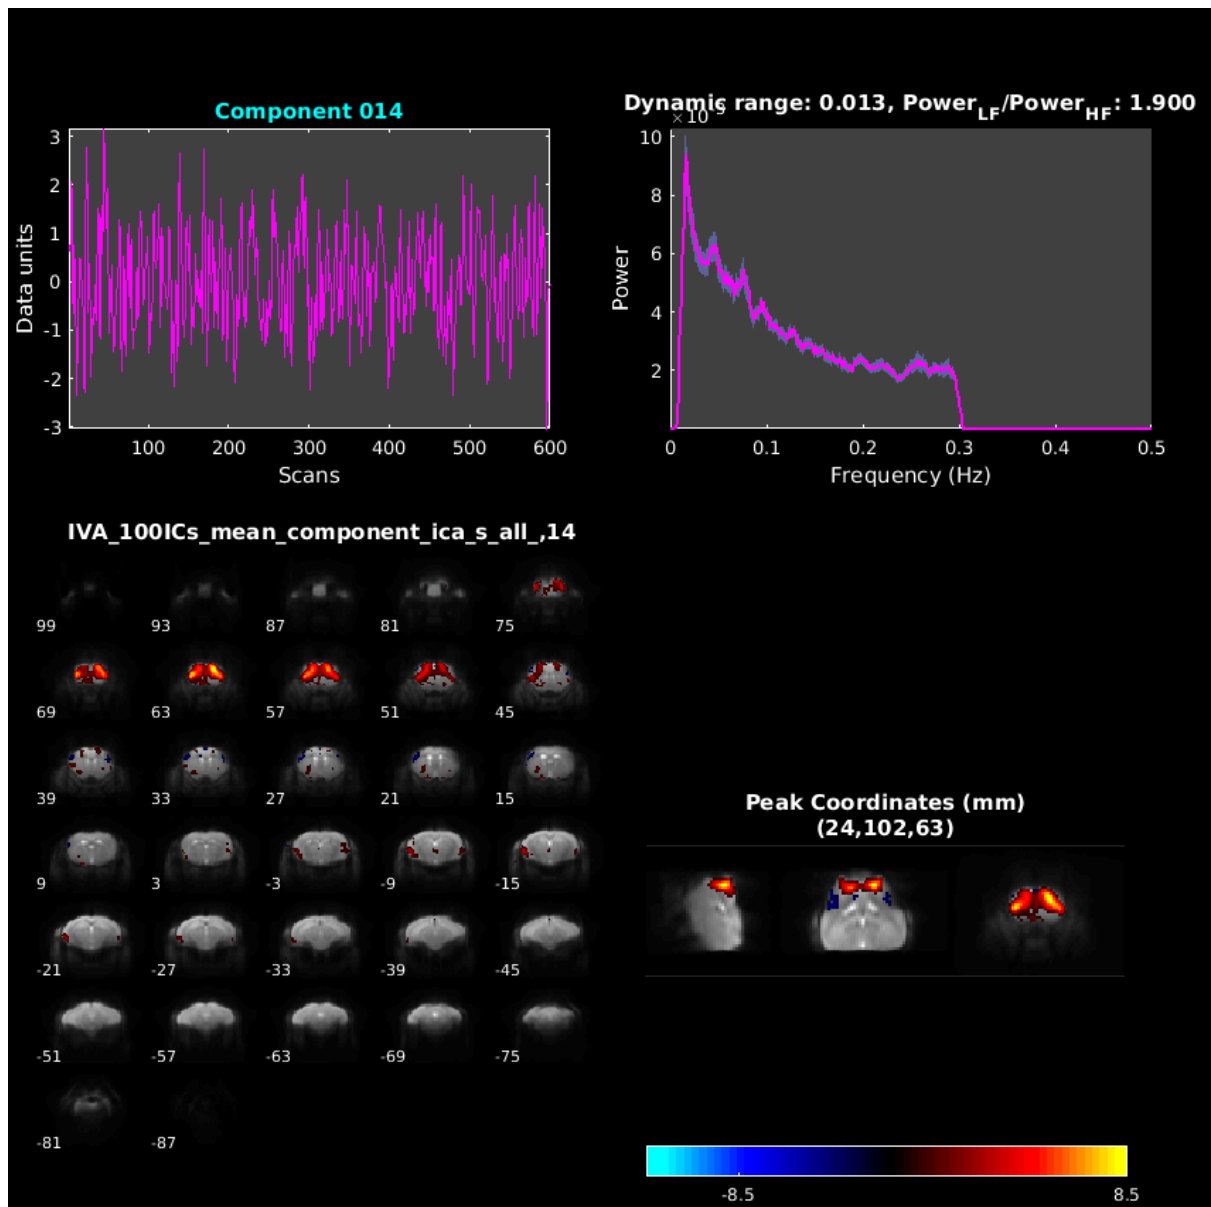

Primary Somatosensory Cortex (Barrel Field, Lower Limbs) + Primary Motor Area

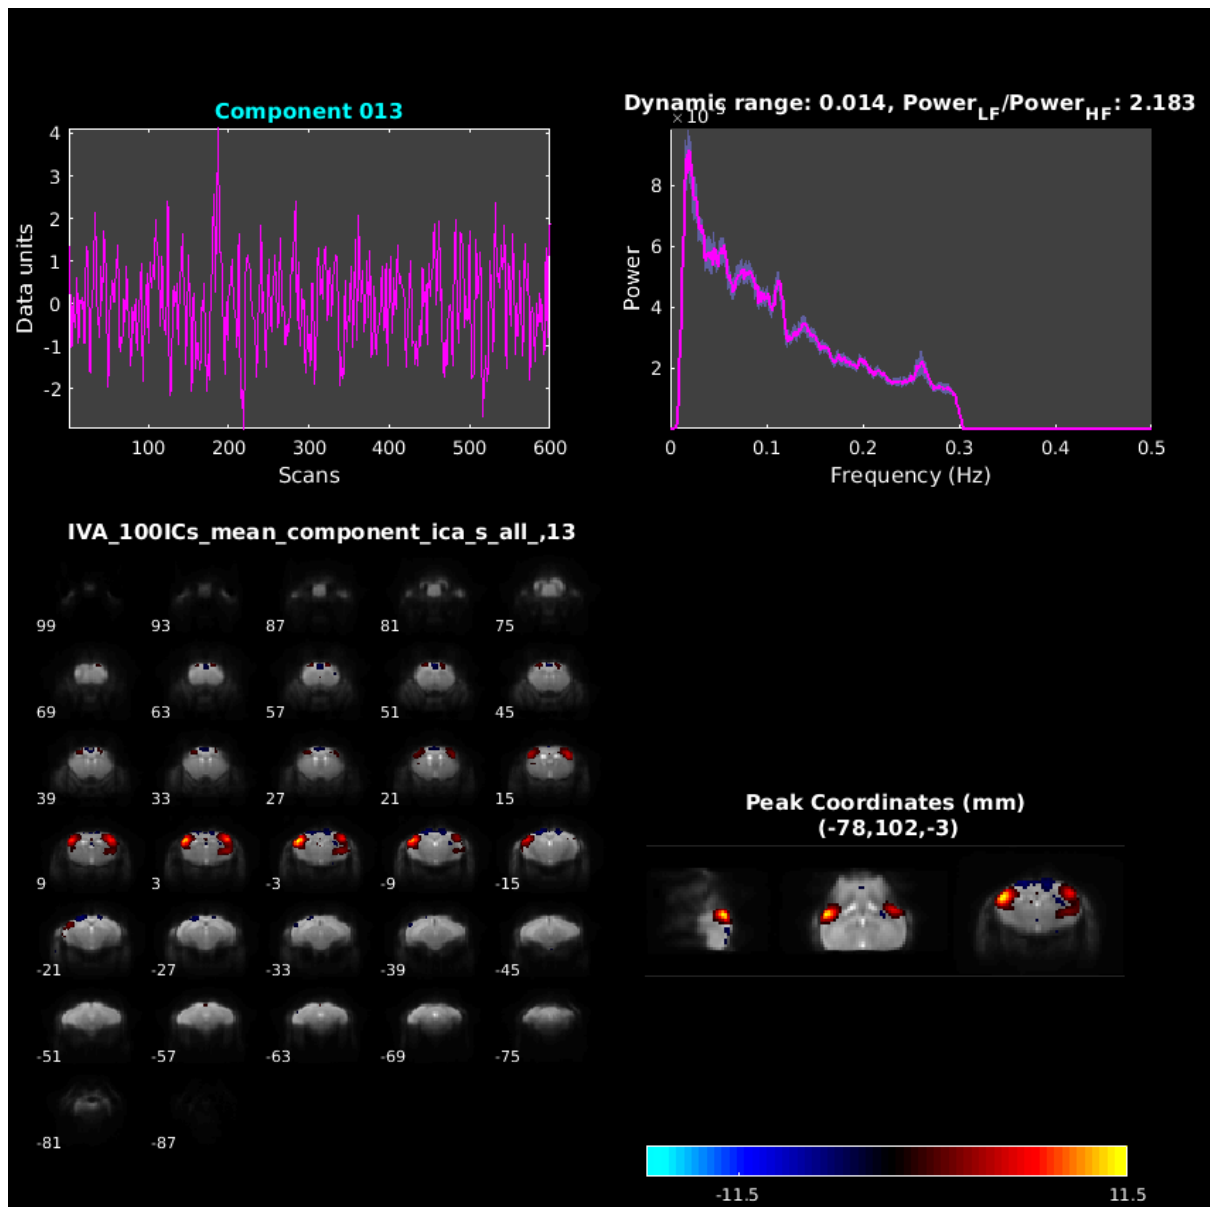

Insula + Endopiriform Nucleus

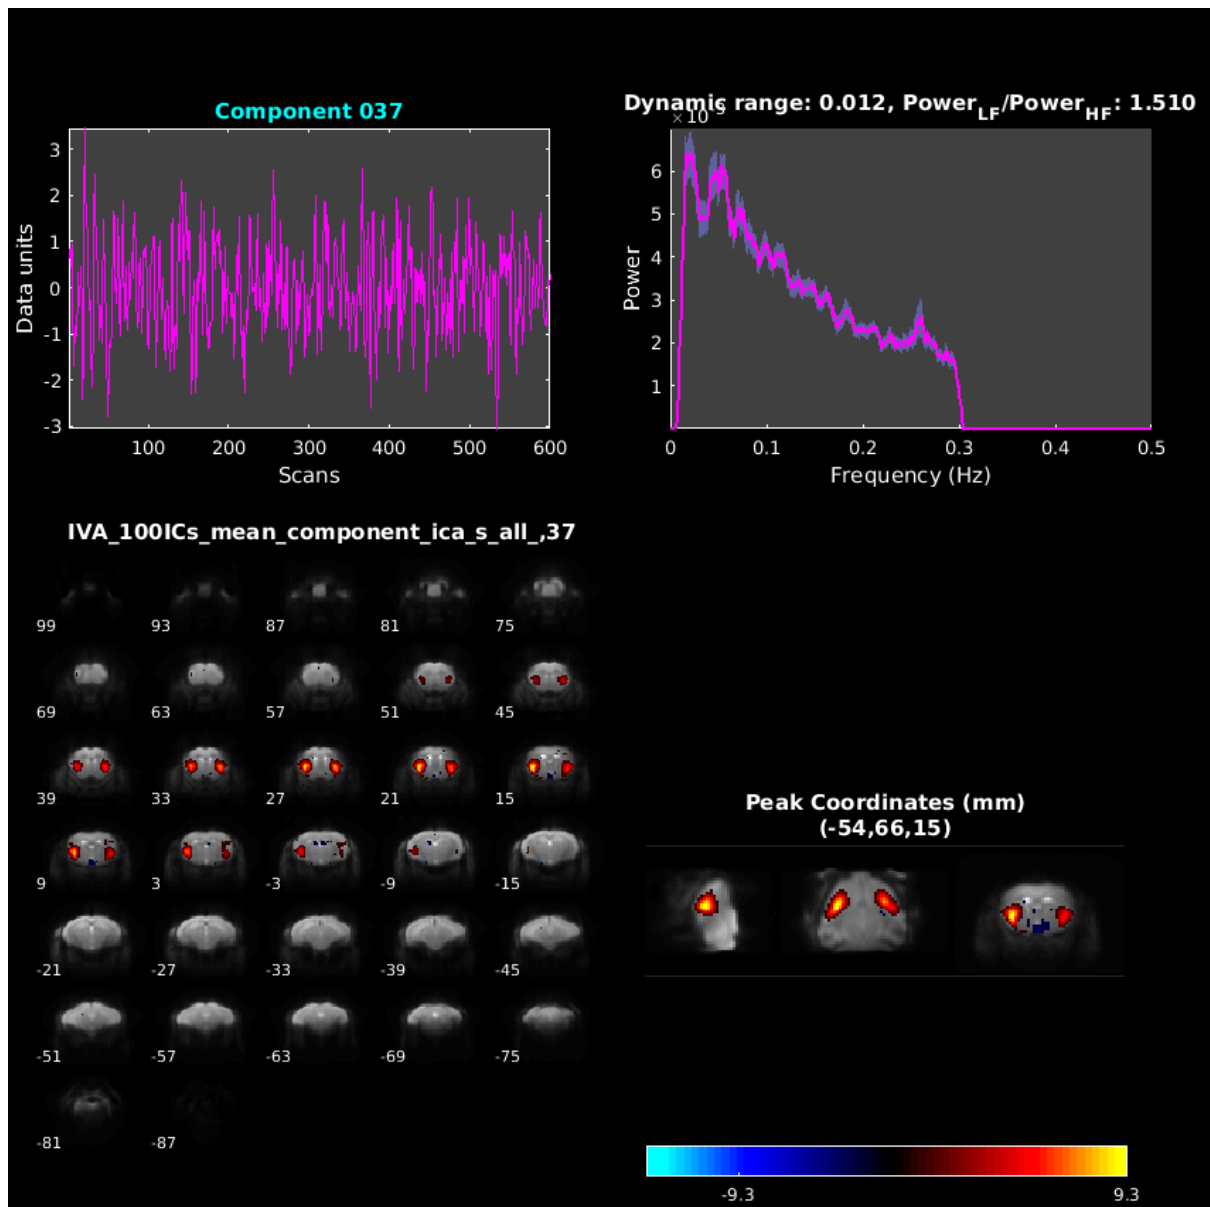

# Amygdala

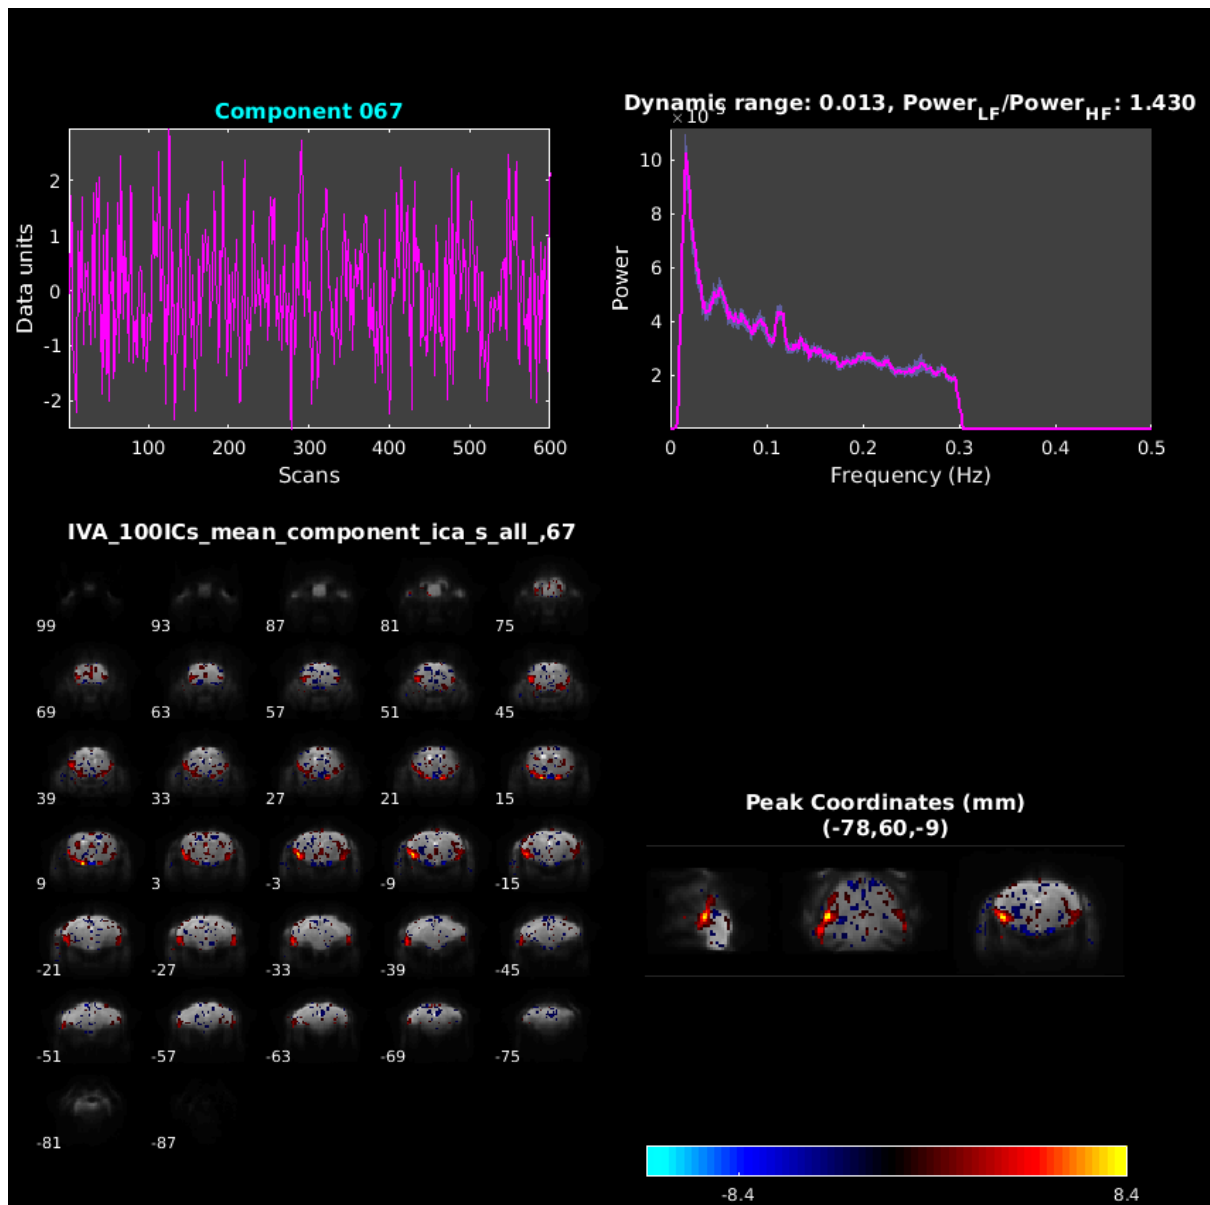

Supplemental Somatosensory cortex (S2) - anterior (bi lateral), Primary Somatosensory Cortex (Nose, Mouth)

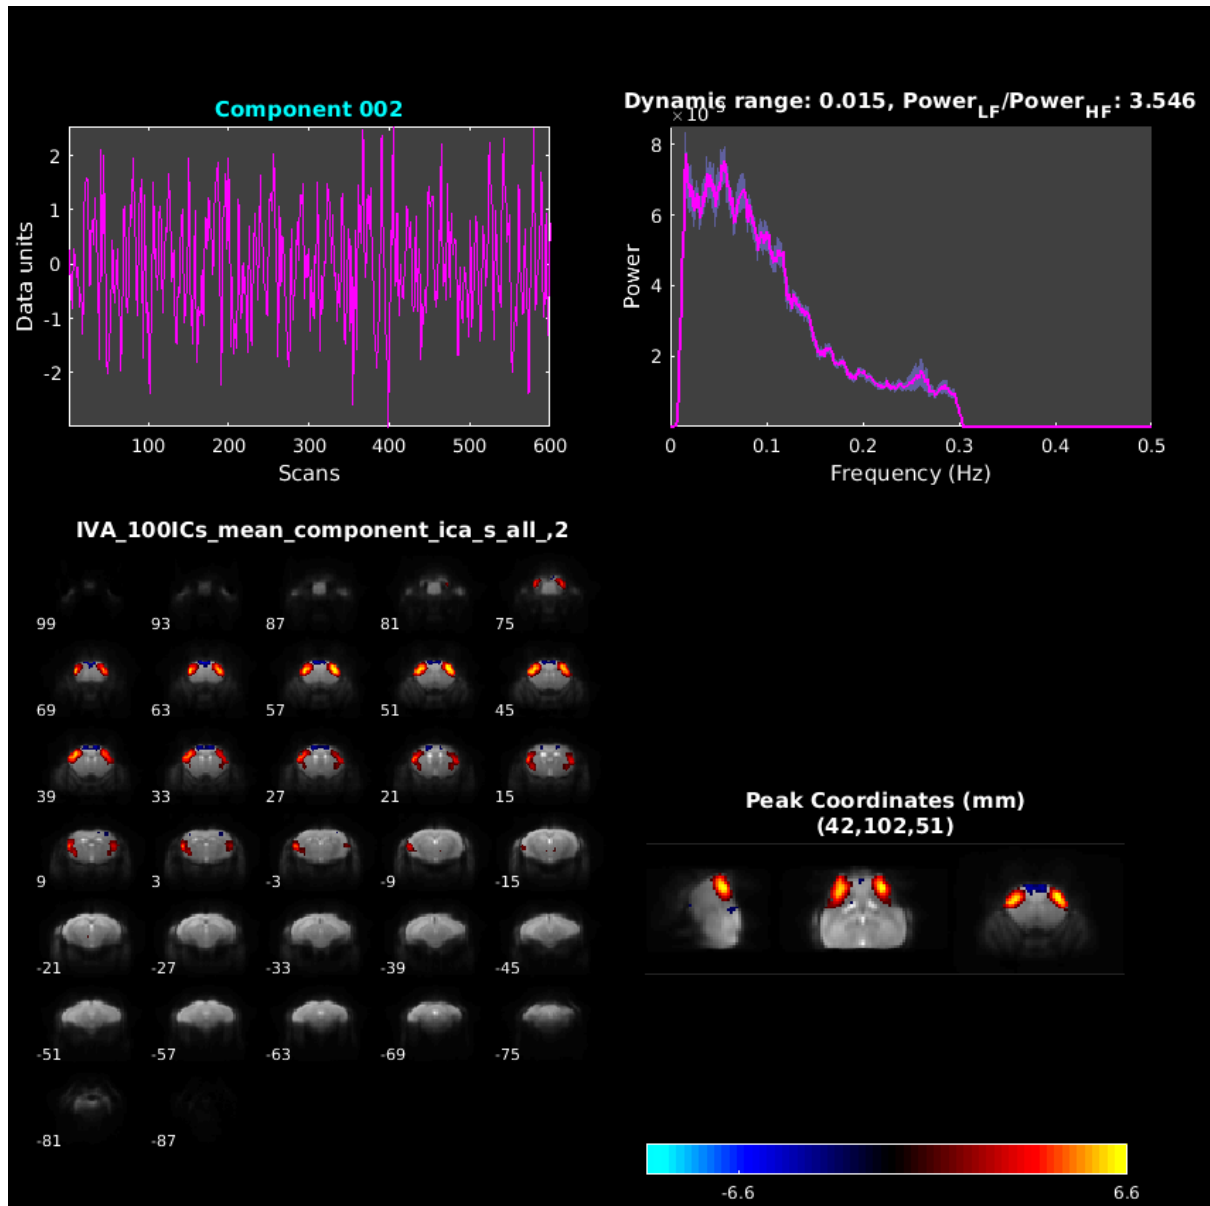

Supplemental somatosensory cortex – Right

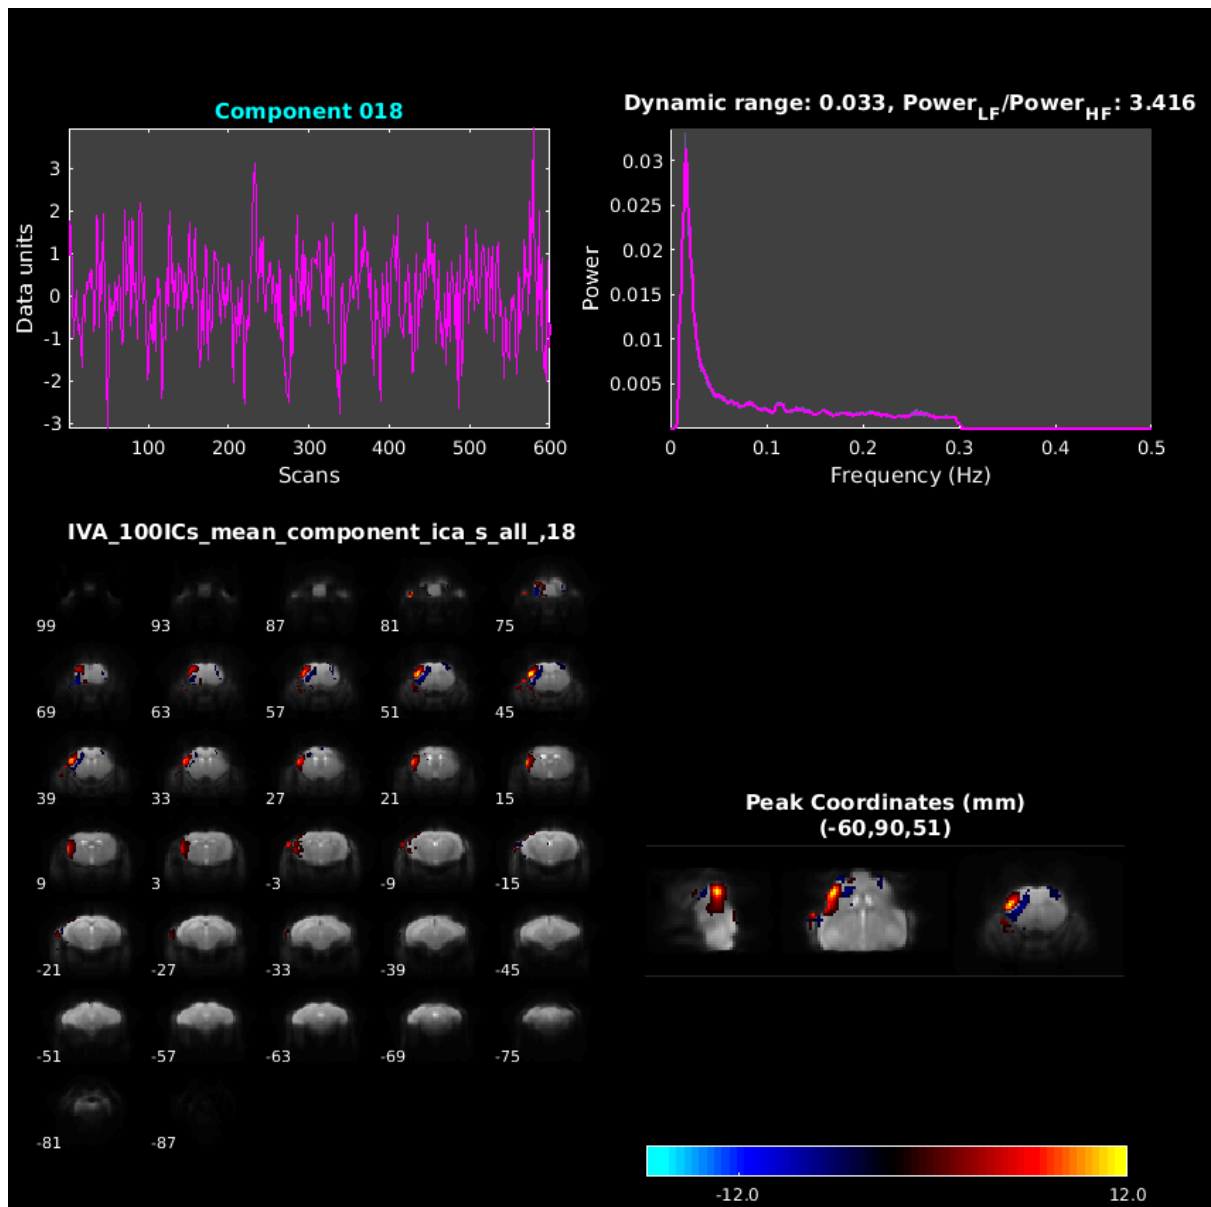

Supplemental somatosensory cortex – Left

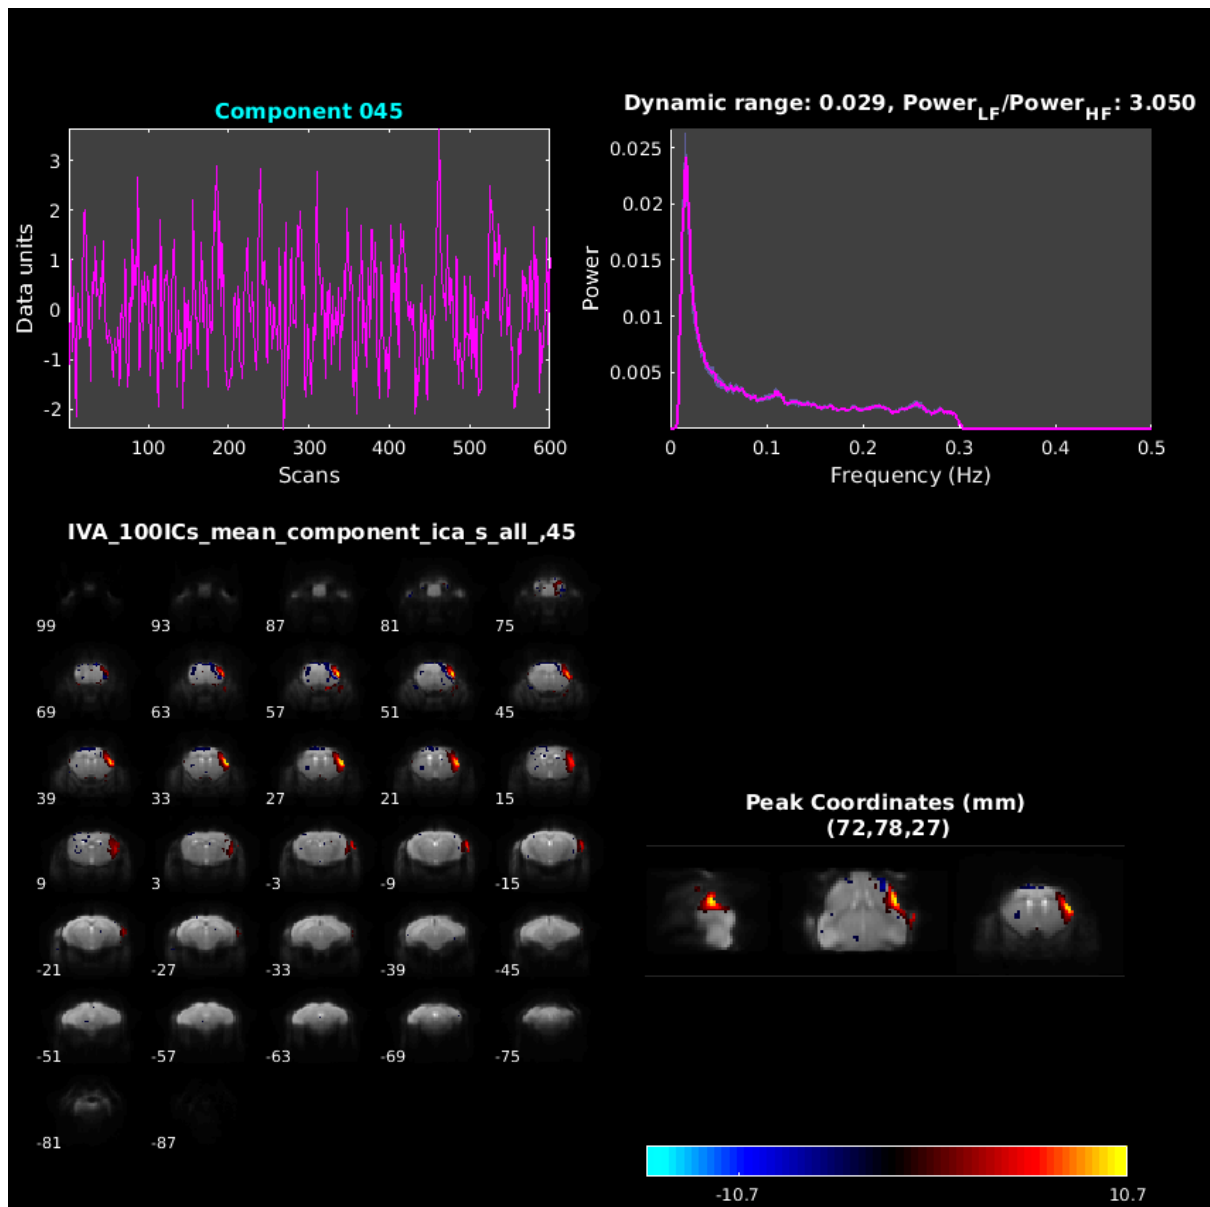

Supplement: 41597_2021_985_MOESM2_ESM.pdf [file 41597_2021_985_MOESM2_ESM.pdf]
