# Supplementary material for: Multi-modal magnetic resonance imaging in a mouse model of concussion
Source: PubMed Central journal article supplement (PMC8342546; doi:10.1038/s41597-021-00985-w), 2021-08-05
Supplement: 41597_2021_985_MOESM1_ESM.pdf [file 41597_2021_985_MOESM1_ESM.pdf]

Supplementary File 1: sham reproducibility test pseudo-groups details

| Animal ID       | Pseudo-group 1 | Pseudo-group 2 |
|-----------------|----------------|----------------|
| C1-1s_shamd2    | 1              | 0              |
| C3-4s_shamd2    | 0              | 1              |
| C4-3s_shamd2    | 0              | 1              |
| C4-4s_shamd2    | 1              | 0              |
| C5-2s_shamd2    | 0              | 1              |
| C9-2s_shamd7    | 0              | 1              |
| C9-4s_shamd2    | 1              | 0              |
| C10-2s_shamd7   | 0              | 1              |
| C11-1s_shamd7   | 1              | 0              |
| C12-1s_shamd14  | 1              | 0              |
| C12-5s_shamd14  | 1              | 0              |
| C13-10s_shamd14 | 0              | 1              |
| C14-12s_shamd14 | 1              | 0              |
| C14-14s_shamd14 | 0              | 1              |

“1” denote the animal belonging to the group and “0” denote its absence. The number array will also serve as FSL’s `fsl_glm` design matrix.
